# Supplementary material for: Novel Sulfonamide-Based Carbamates as Selective Inhibitors of BChE
Source: MDPI journal article supplement (doi:10.3390/ijms22179447), 2021-08-31
Supplement: s1 [file s1]

## Supporting Materials

### Novel sulfonamide-based carbamates as selective inhibitors of BChE

**Pratibha Magara<sup>1</sup>, Oscar Parravicini<sup>2</sup>, Šárka Štěpánková<sup>3</sup>, Katarina Svrčková<sup>3</sup>, Adriana D. Garro<sup>2</sup>, Izabela Jendrzejska<sup>4</sup>, Karel Pauk<sup>1</sup>, Jan Hošek<sup>5</sup>, Josef Jampilek<sup>6,7</sup>, Ricardo D. Enriz<sup>2\*</sup> and Aleš Imramovský<sup>1\*</sup>**

- <sup>1</sup>. Institute of Organic Chemistry and Technology, Faculty of Chemical Technology, University of Pardubice, Studentska 573, 532 10 Pardubice, Czech Republic; partibha.magar@gmail.com (P.M.); ales.imramovsky@upce.cz (A.I.)
- <sup>2</sup>. Facultad de Química, Bioquímica y Farmacia, Universidad Nacional de San Luis; Instituto Multidisciplinario de Investigaciones Biológicas (IMIBIO-SL). Chacabuco 915, 5700 San Luis, Argentina; e-mail: denriz@unsl.edu.ar
- <sup>3</sup>. Department of Biological and Biochemical Sciences, Faculty of Chemical Technology, University of Pardubice, Studentska 573, 532 10 Pardubice, Czech Republic; sarka.stepankova@upce.cz (S.S.); katarina.svrckova@upce.cz (K.S.)
- <sup>4</sup>. Institute of Chemistry, University of Silesia, Szkolna 9, 40007 Katowice, Poland; izabela.jendrzejska@us.edu.pl
- <sup>5</sup>. Department of Pharmacology and Toxicology, Veterinary Research Institute, Hudcova 296/70, 621 00 Brno, Czech Republic; hosek.jan@vri.cz
- <sup>6</sup>. Department of Analytical Chemistry, Faculty of Natural Sciences, Comenius University, Ilkovicova 6, 842 15 Bratislava, Slovakia; josef.jampilek@gmail.com
- <sup>7</sup>. Institute of Neuroimmunology, Slovak Academy of Sciences, Dubravska Cesta 9, 845 10 Bratislava, Slovakia

\* Correspondence: denriz@unsl.edu.ar (R.E.), ales.imramovsky@upce.cz (A.I.)

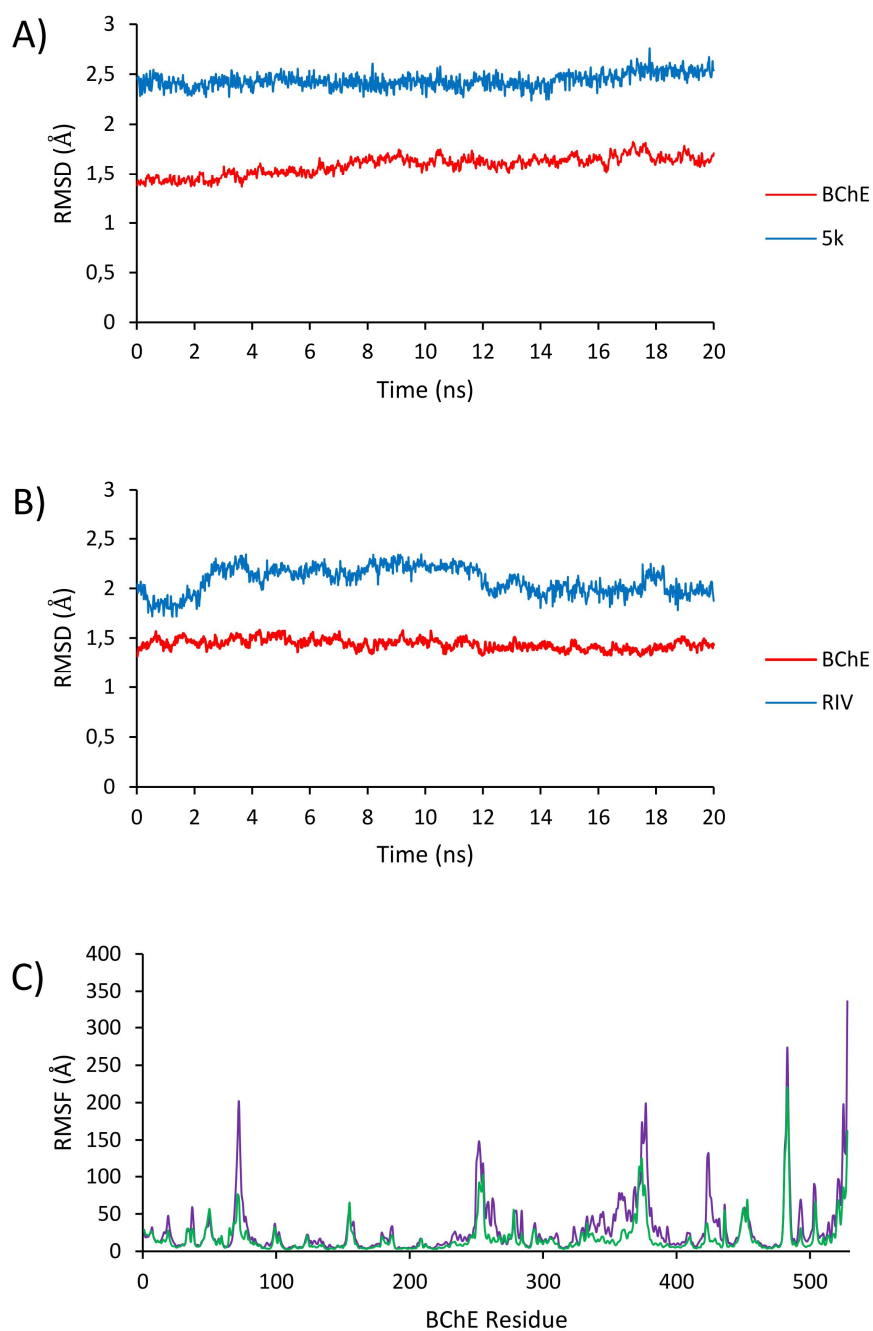

**Figure S1** Root-mean-square deviations (RMSD) of (A) BChE-5k and (B) BChE-RIV complexes. (C) Comparative root-mean-square fluctuations (RMSF) of the C $\alpha$  atoms of BChE when complexed with 5k (violet) and RIV (green).

## Experimental part

All reagents and solvents were purchased from commercial sources (TCI Europe, Sigma-Aldrich, Acros organics, fluorochem, Merck, Lach-Ner). Commercial grade reagents were used without further purification. Reactions were monitored by thin layer chromatography plates coated with 0.2 mm silica gel 60 F<sub>254</sub> (Merck). TLC plates were visualized by UV irradiation (254 nm) or in a 5% solution of phosphomolybdic acid in ethanol. All melting points were determined on a Melting Point B-540 apparatus (Büchi, Switzerland) and are uncorrected. IR spectra were recorded on a Nicolet 6700 FT-IR spectrometer (Thermo Fisher Scientific, Waltham, MA, USA) over the range of 400–4000 cm<sup>-1</sup> using the ATR technique. NMR spectra were measured in CDCl<sub>3</sub> solutions at ambient temperature on a Bruker Avance™ III 400 spectrometer at frequencies <sup>1</sup>H (400 MHz), <sup>13</sup>C (100.26 MHz), and <sup>19</sup>F (376.46) or a Bruker Ascend™ 500 spectrometer at frequencies <sup>1</sup>H (500.13 MHz), <sup>13</sup>C {<sup>1</sup>H} (125.76 MHz), and <sup>19</sup>F (470.61 MHz). Chemical shifts,  $\delta$ , are given in ppm, related to the residual solvent peak CDCl<sub>3</sub> 7.27 or to tetramethylsilane (TMS) as an internal standard. The coupling constants (*J*) are reported in [Hz]. Elemental analysis (C, H, N, S) was performed on an automatic microanalyzer Flash 2000 organic elemental analyzer. Mass spectrometry with high resolution was performed by the dried droplet method using a MALDI mass spectrometer LTQ Orbitrap XL (Thermo Fisher Scientific) equipped with a nitrogen UV laser (337 nm, 60 Hz). Spectra were measured in the positive ion mode and in regular mass extent with resolution 100,000 at *m/z* = 400. 2,5-Dihydroxybenzoic acid (DBH) was used as the matrix.

## Characterization data of prepared compounds:

# 1.1. Copy of $^1\text{H}$ NMR of **2a**

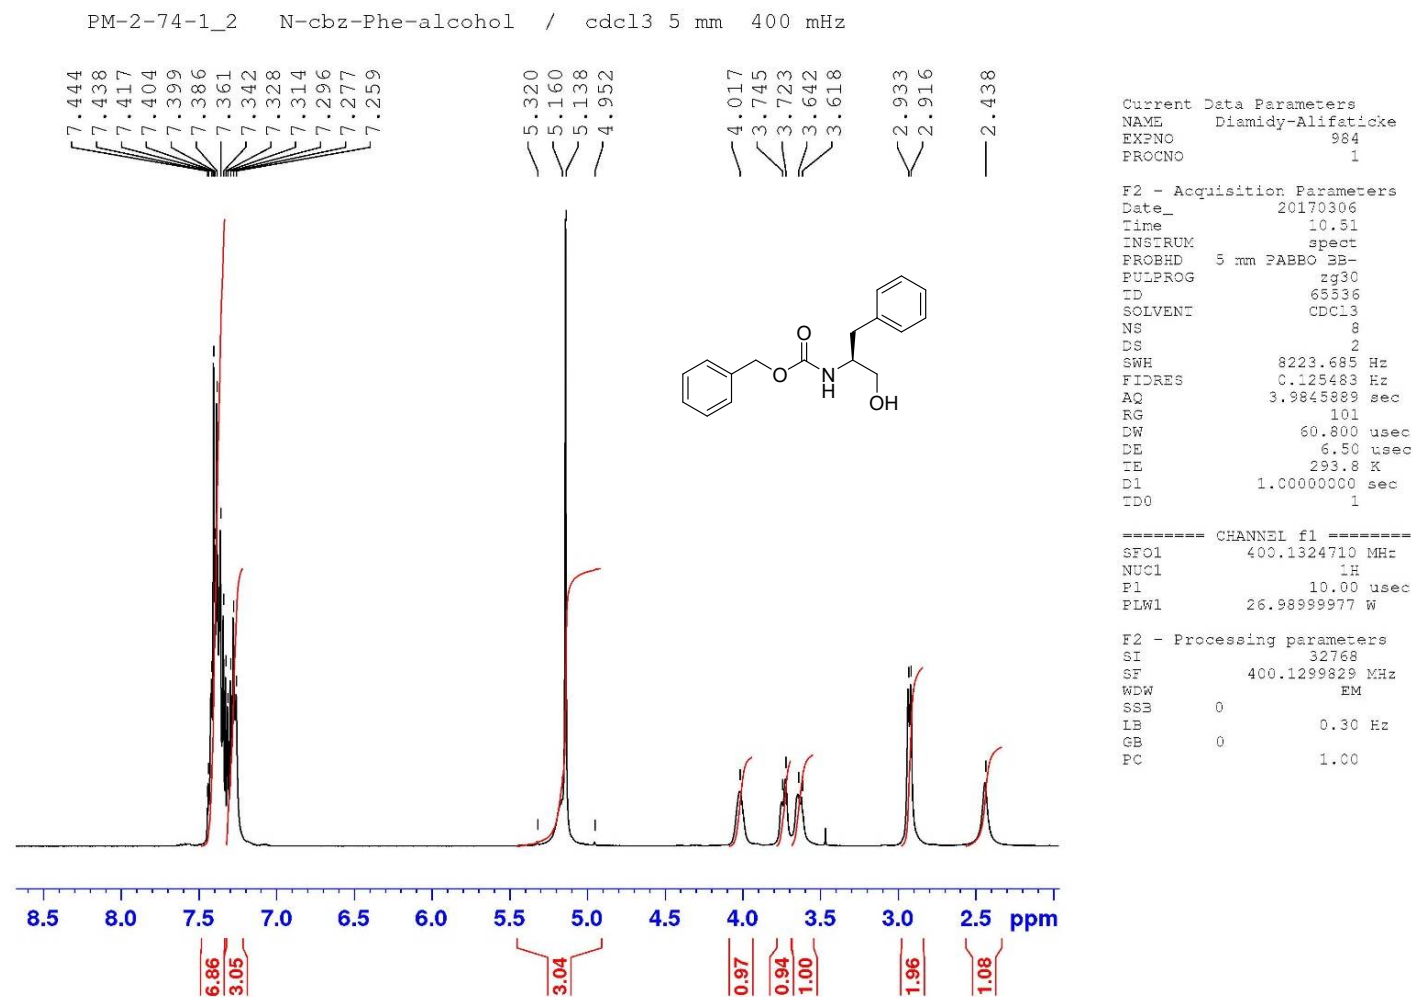



## 1.2. Copy of $^{13}\text{C}$ NMR of **2a**

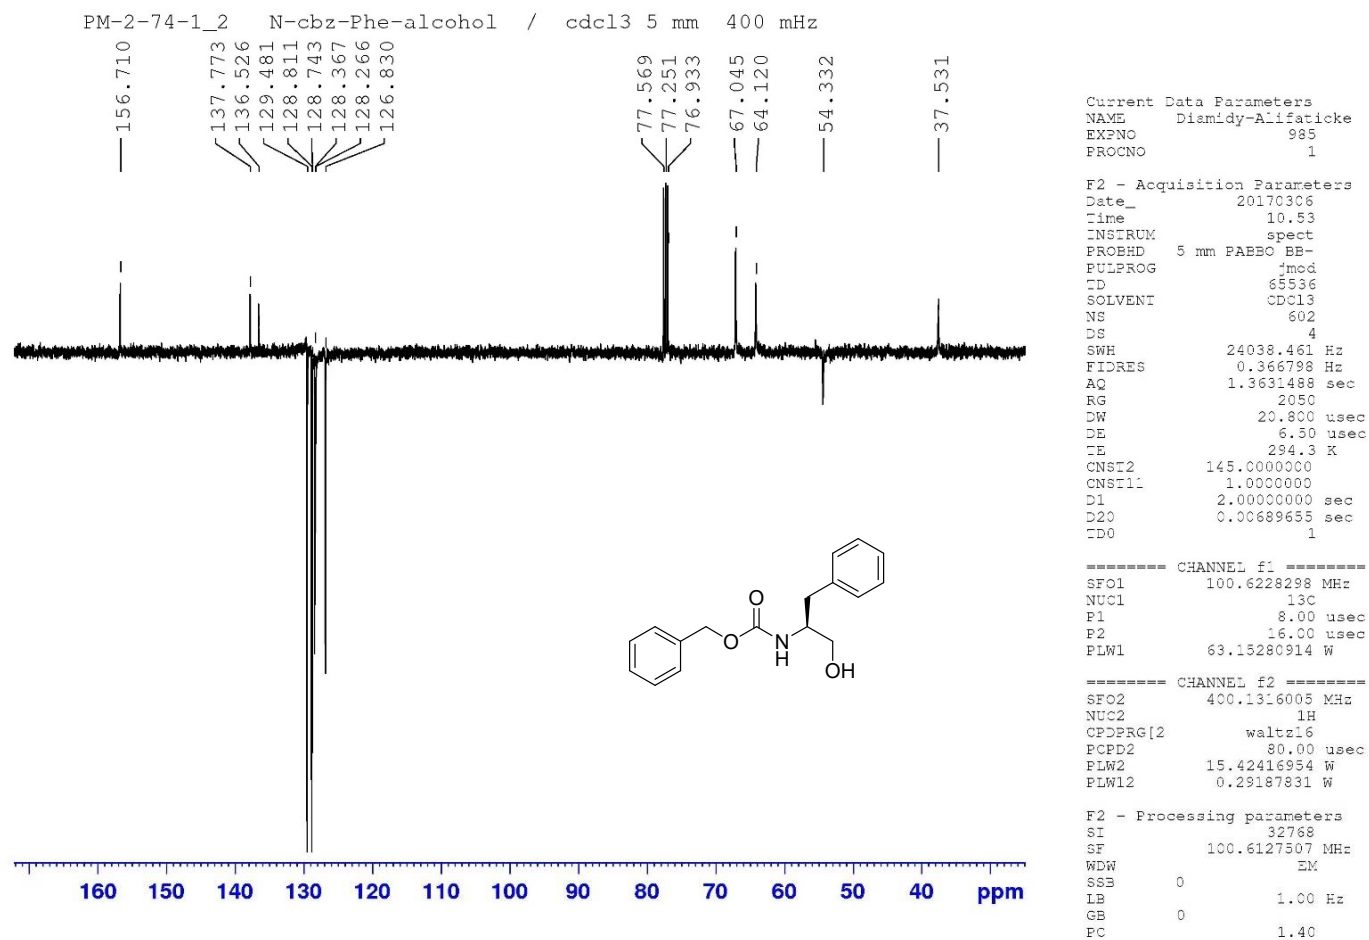

### 1.3. Copy of $^1\text{H}$ NMR of **2b**

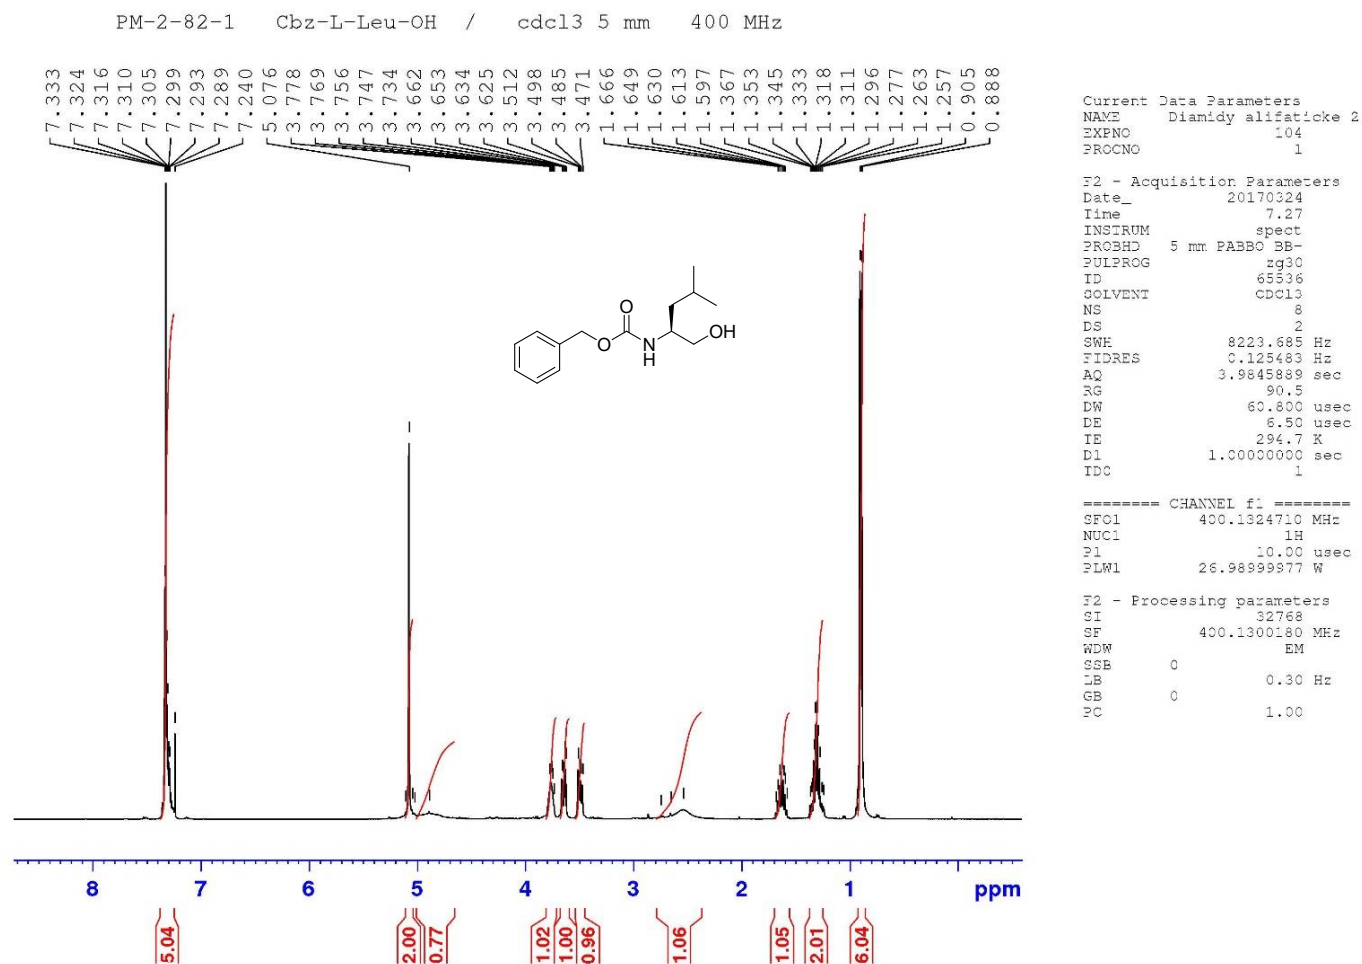

# 1.4. Copy of $^{13}\text{C}$ NMR of **2b**

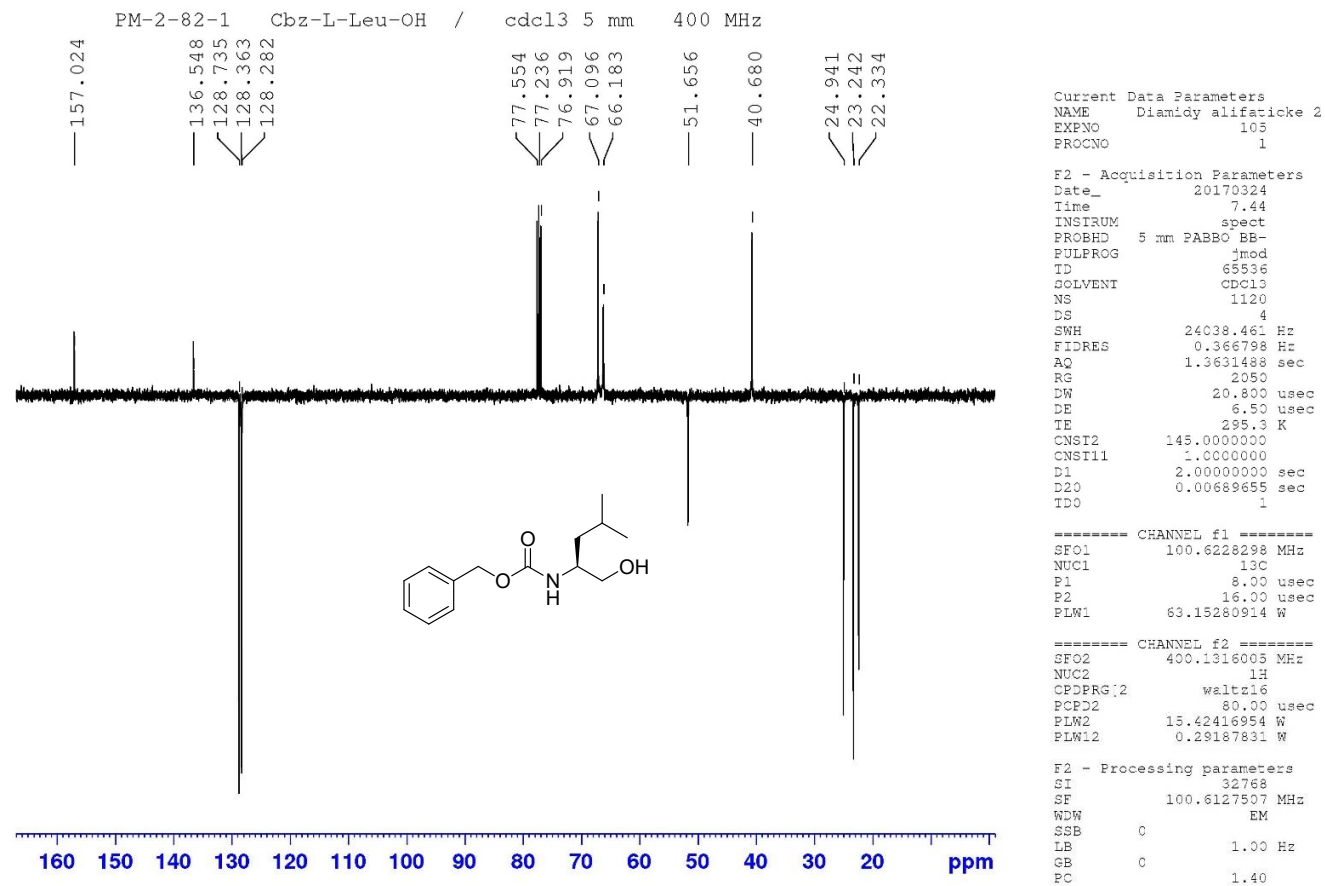

# 1.5. Copy of $^1\text{H}$ NMR of **2c**

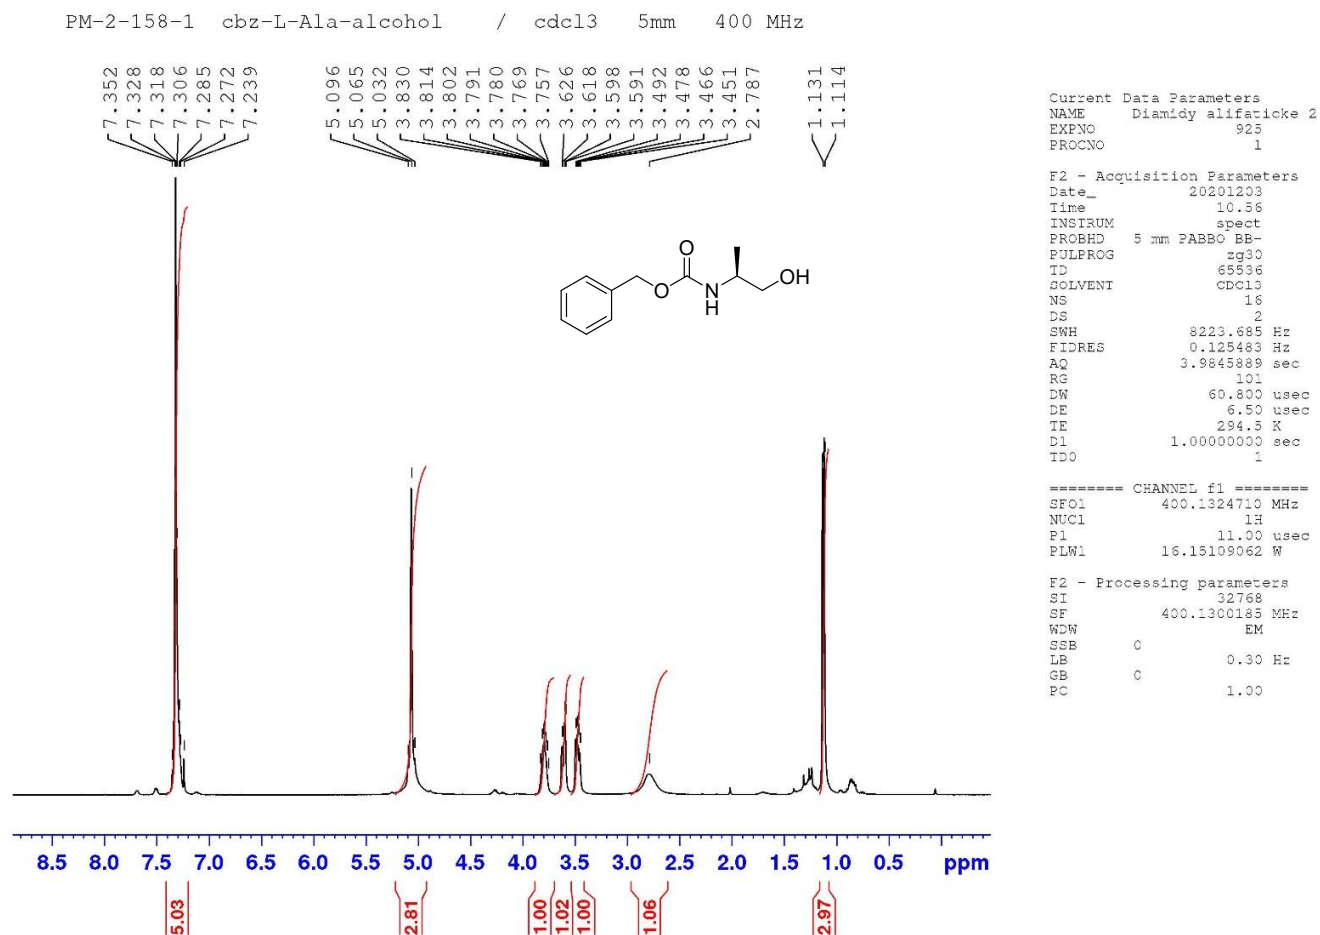

## 1.6. Copy of $^{13}\text{C}$ NMR of **2c**

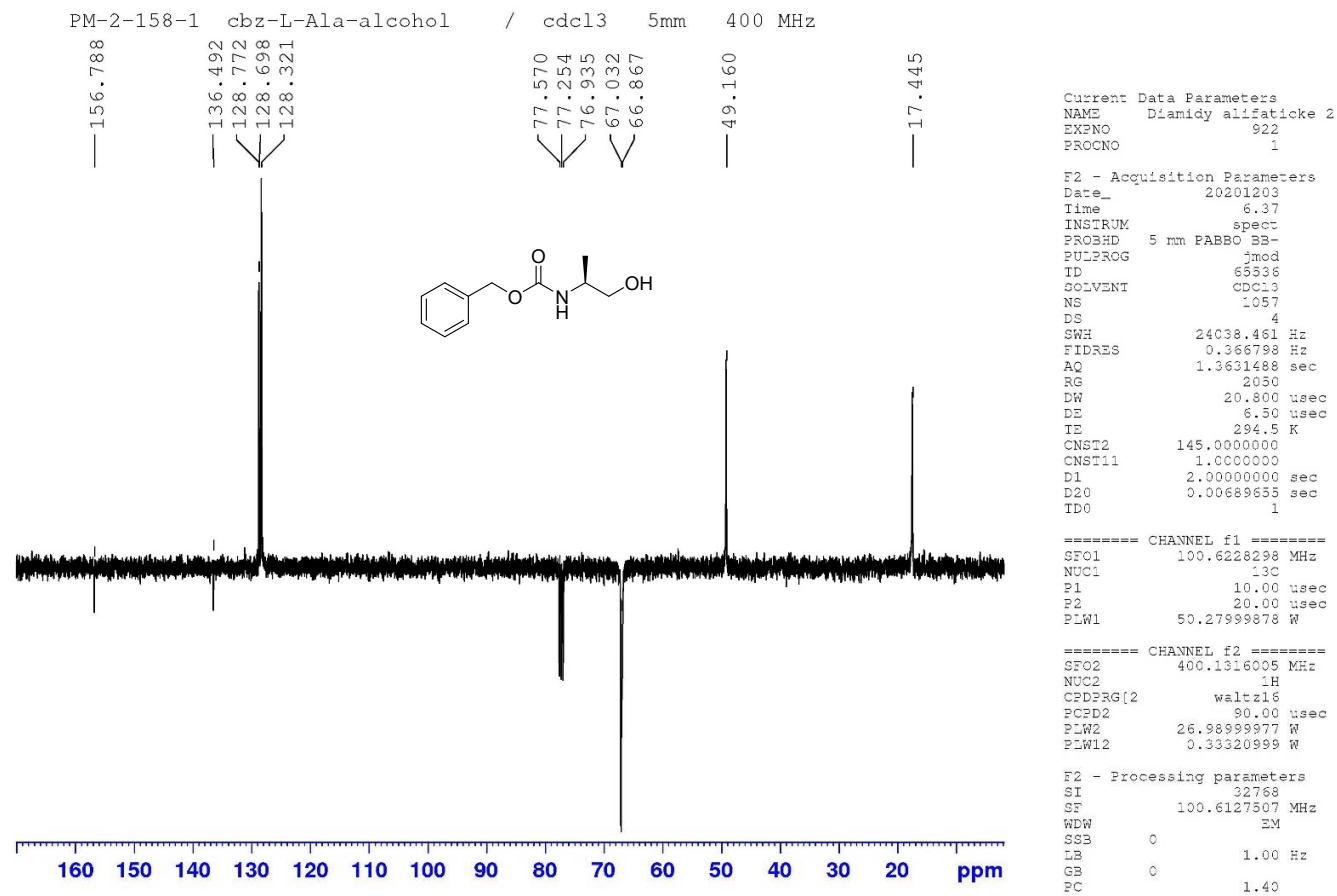

# 1.7. Copy of $^1\text{H}$ NMR of **3a**

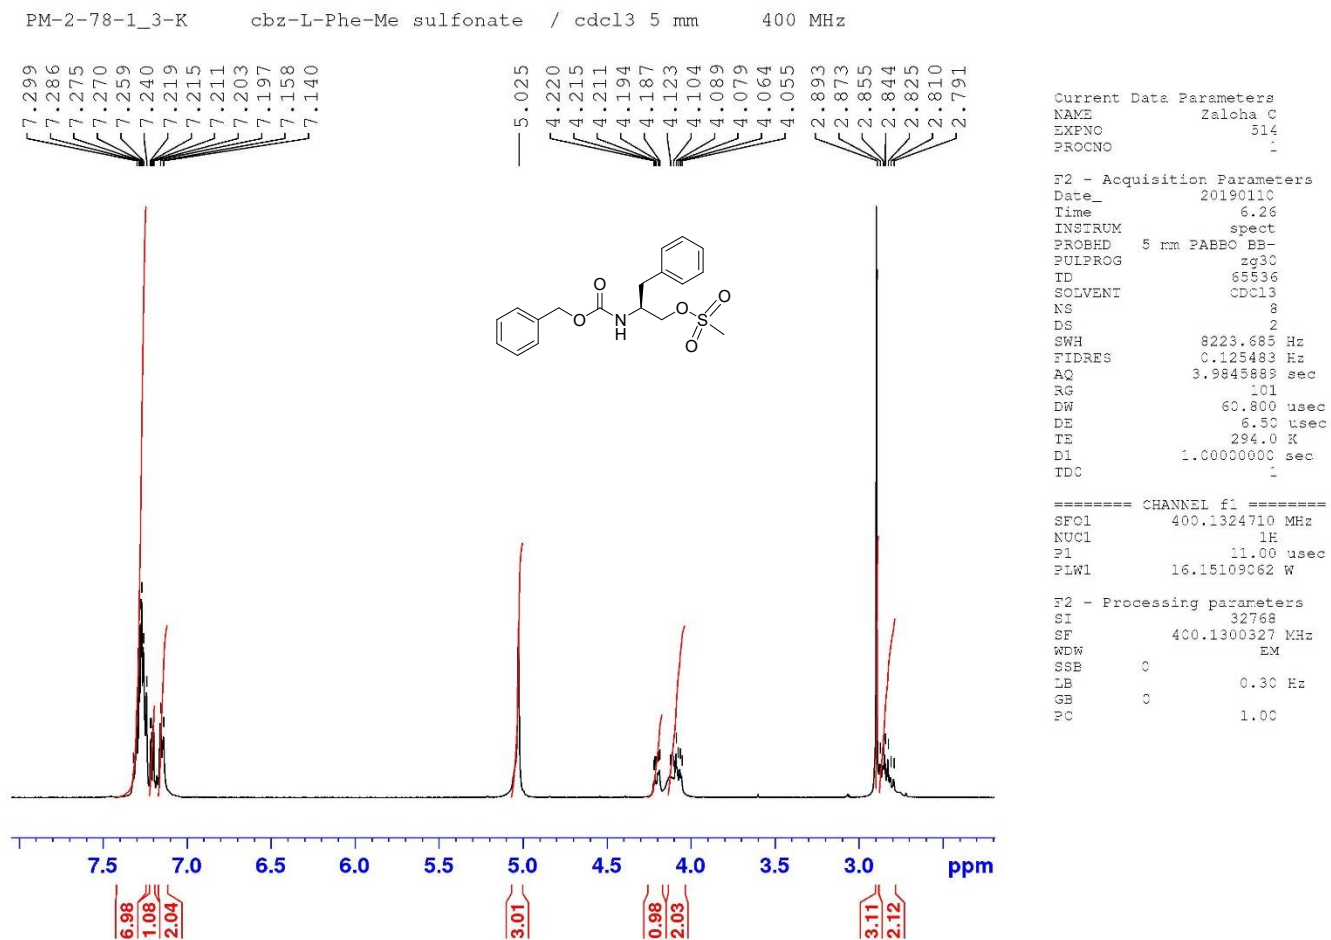

# 1.8. Copy of $^{13}\text{C}$ NMR of **3a**

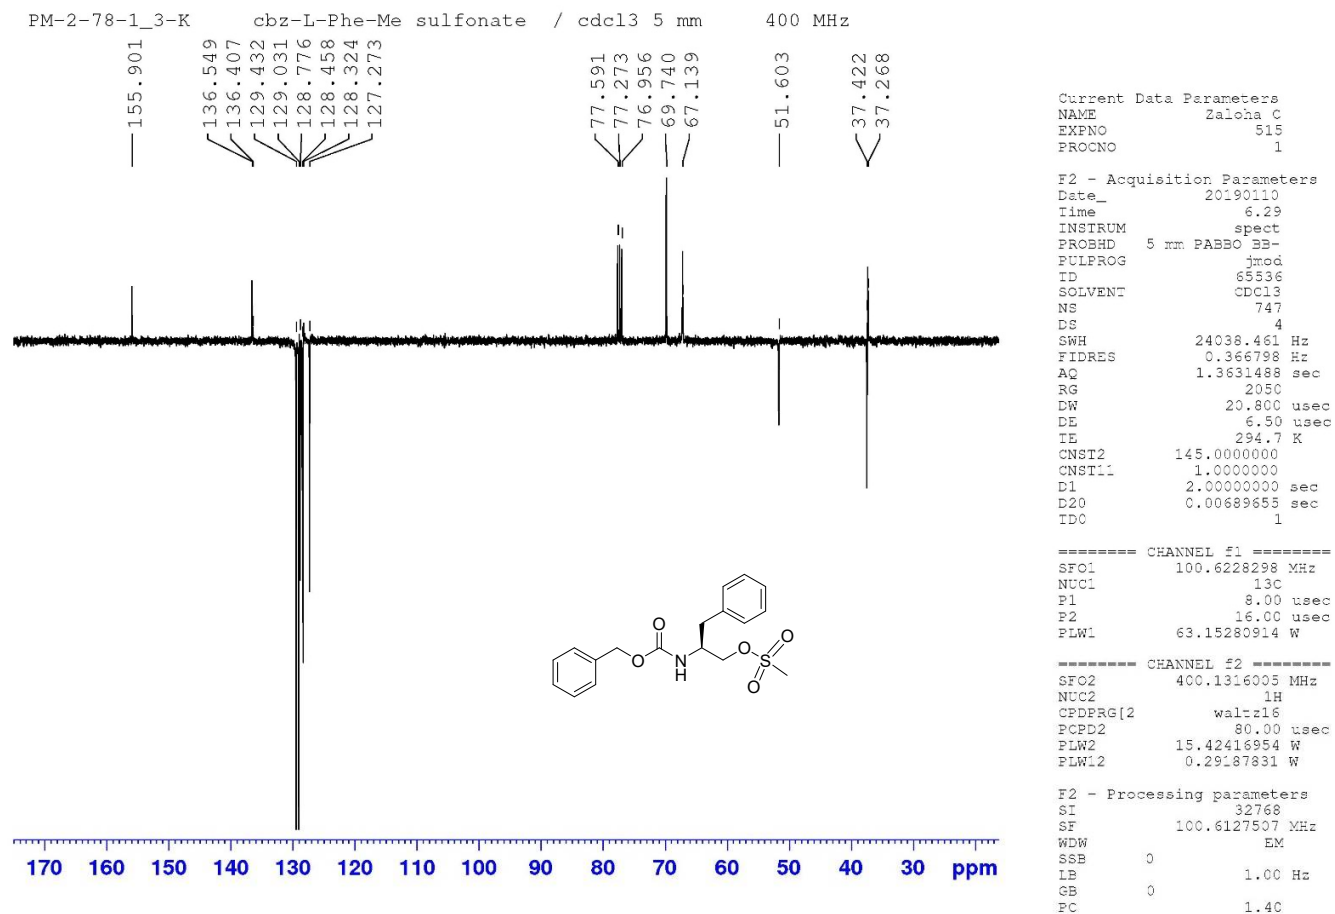

# 1.9. Copy of $^1\text{H}$ NMR of **3b**

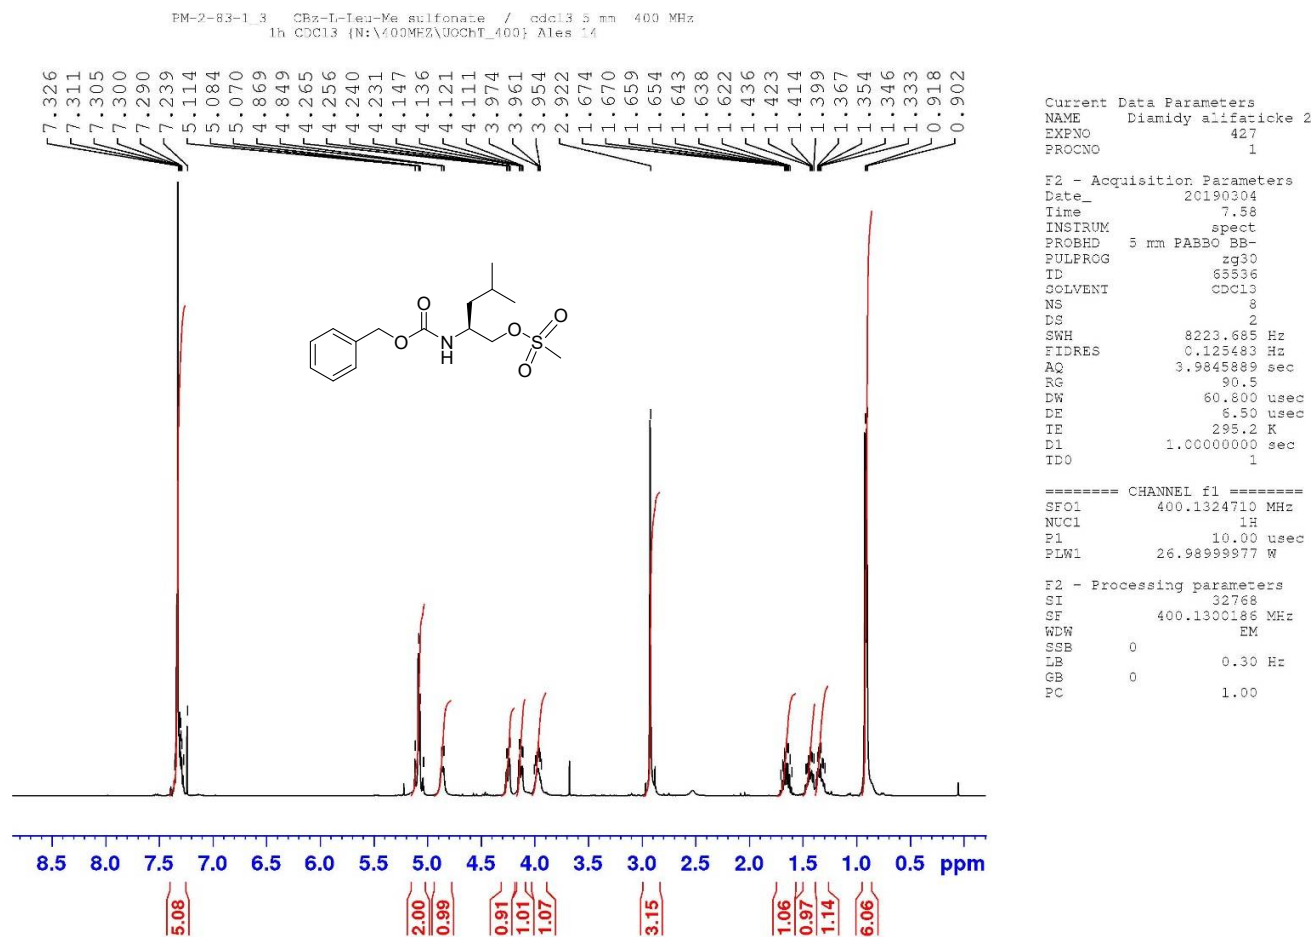



# 1.10. Copy of $^{13}\text{C}$ NMR of **3b**

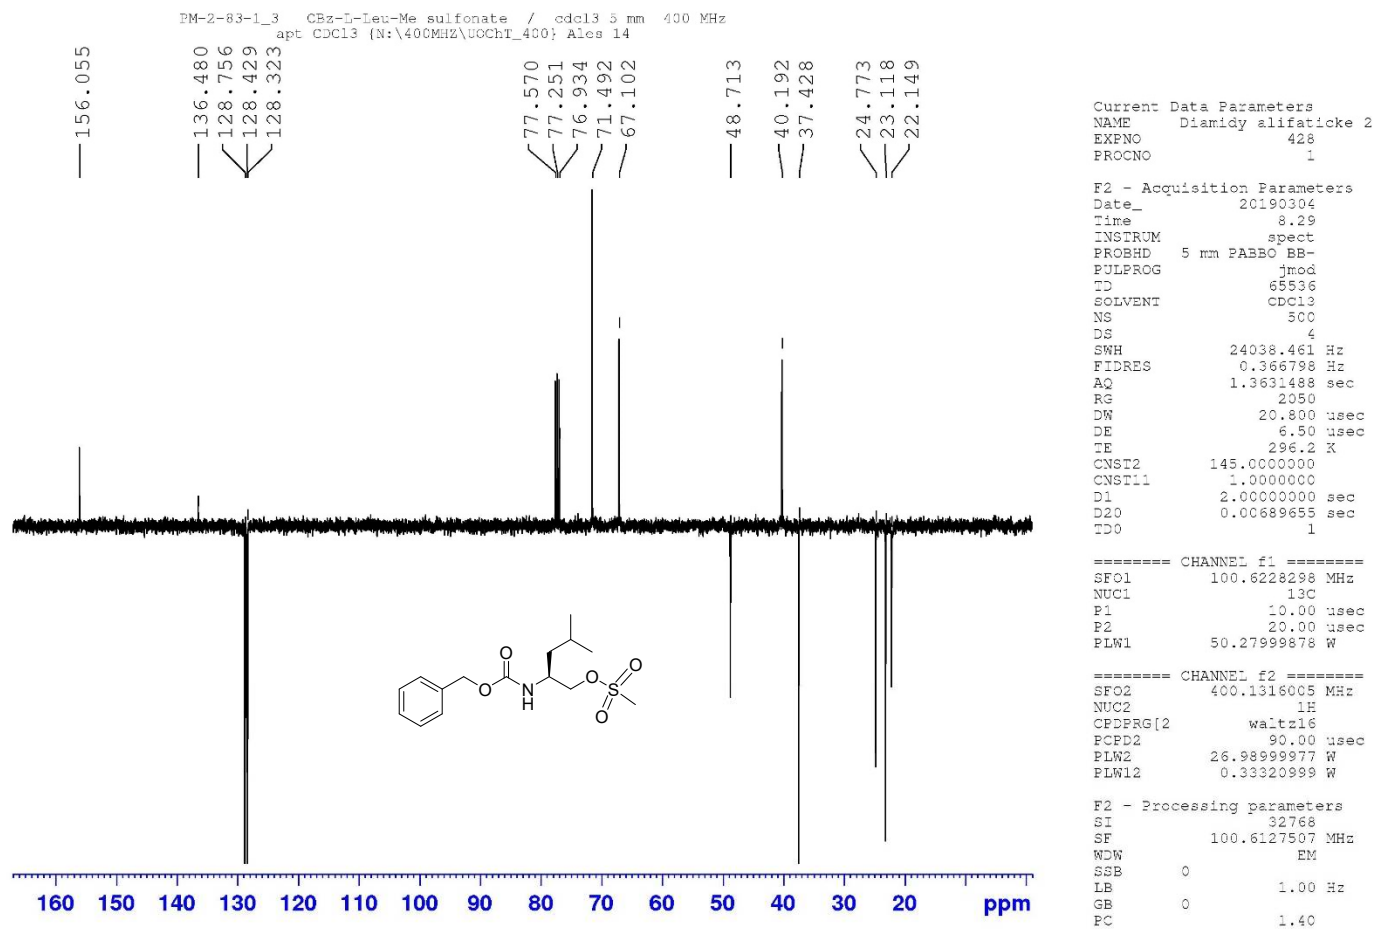

# 1.11. Copy of $^1\text{H}$ NMR of **3c**

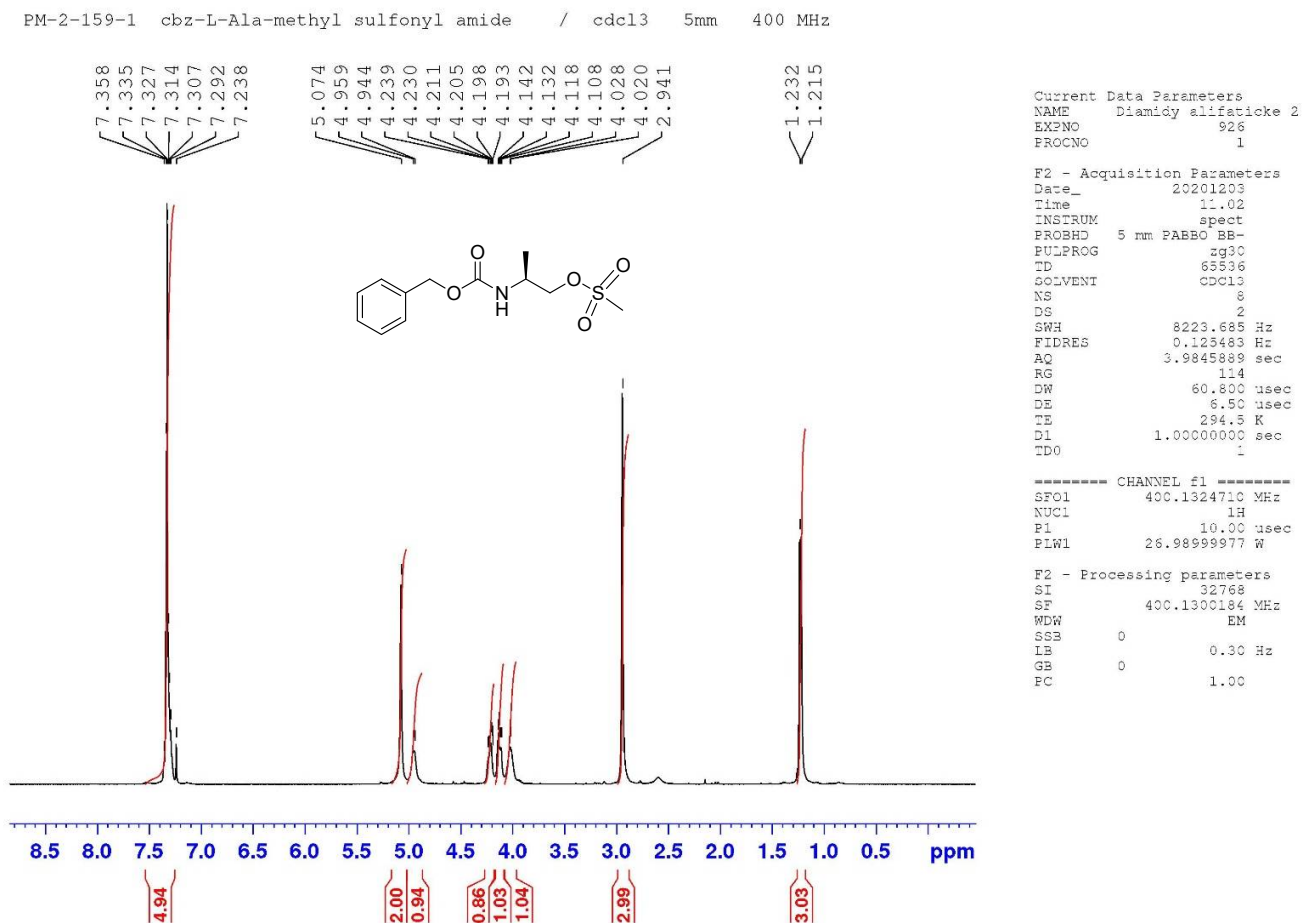

# 1.12. Copy of $^{13}\text{C}$ NMR of **3c**

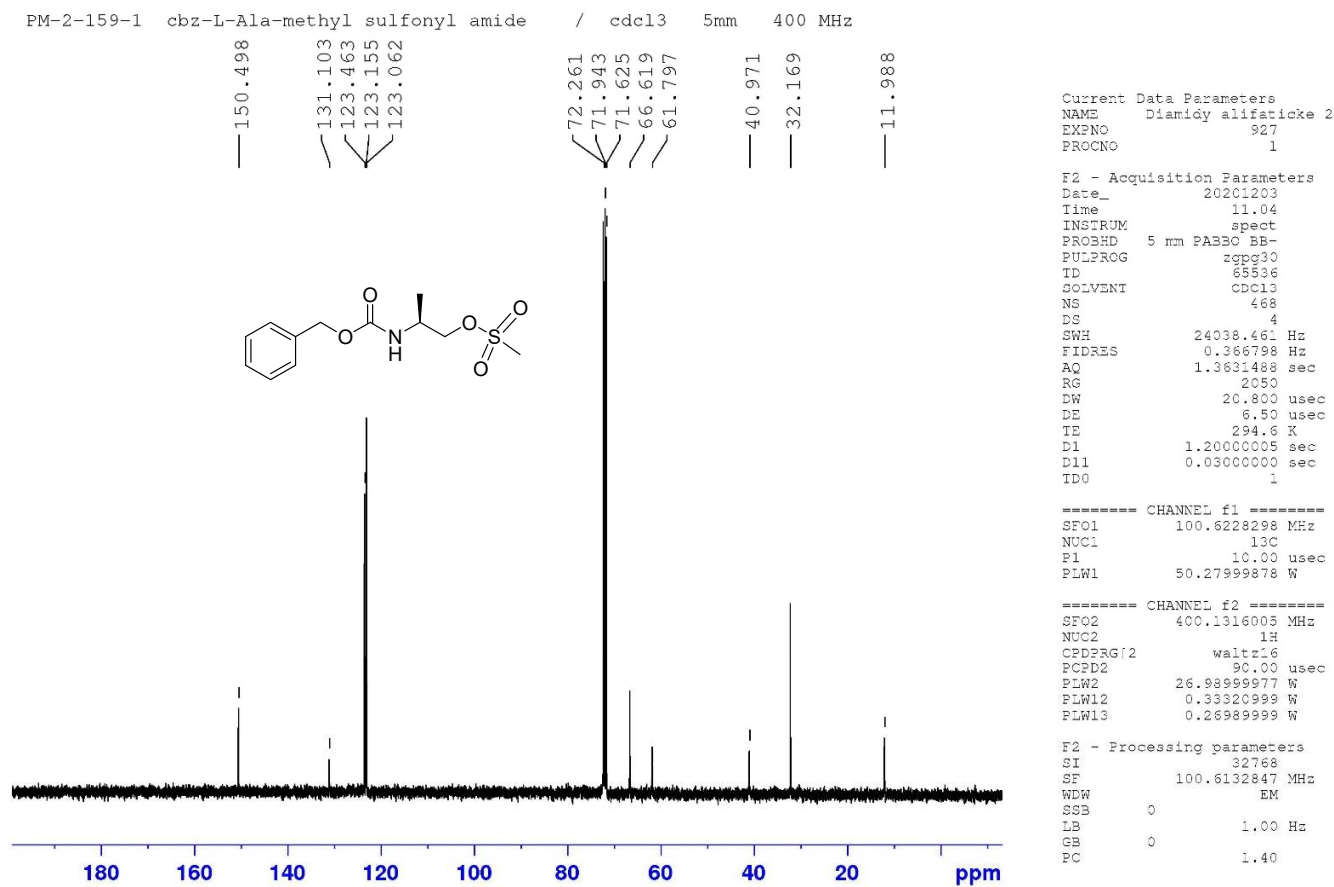

### 1.13. Copy of $^1\text{H}$ NMR of **4a**

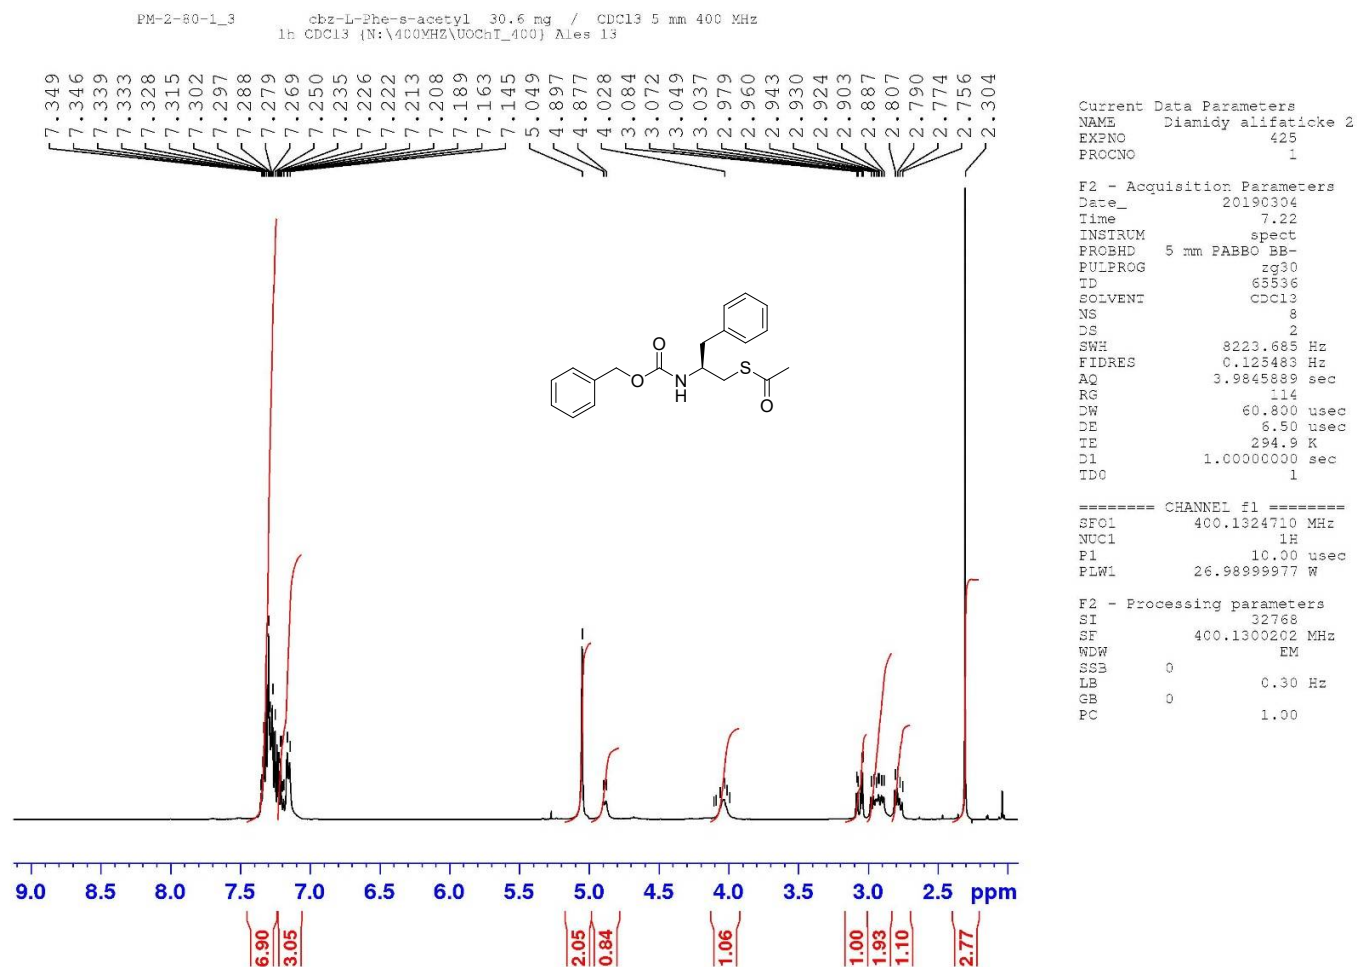

# 1.14. Copy of $^{13}\text{C}$ NMR of **4a**

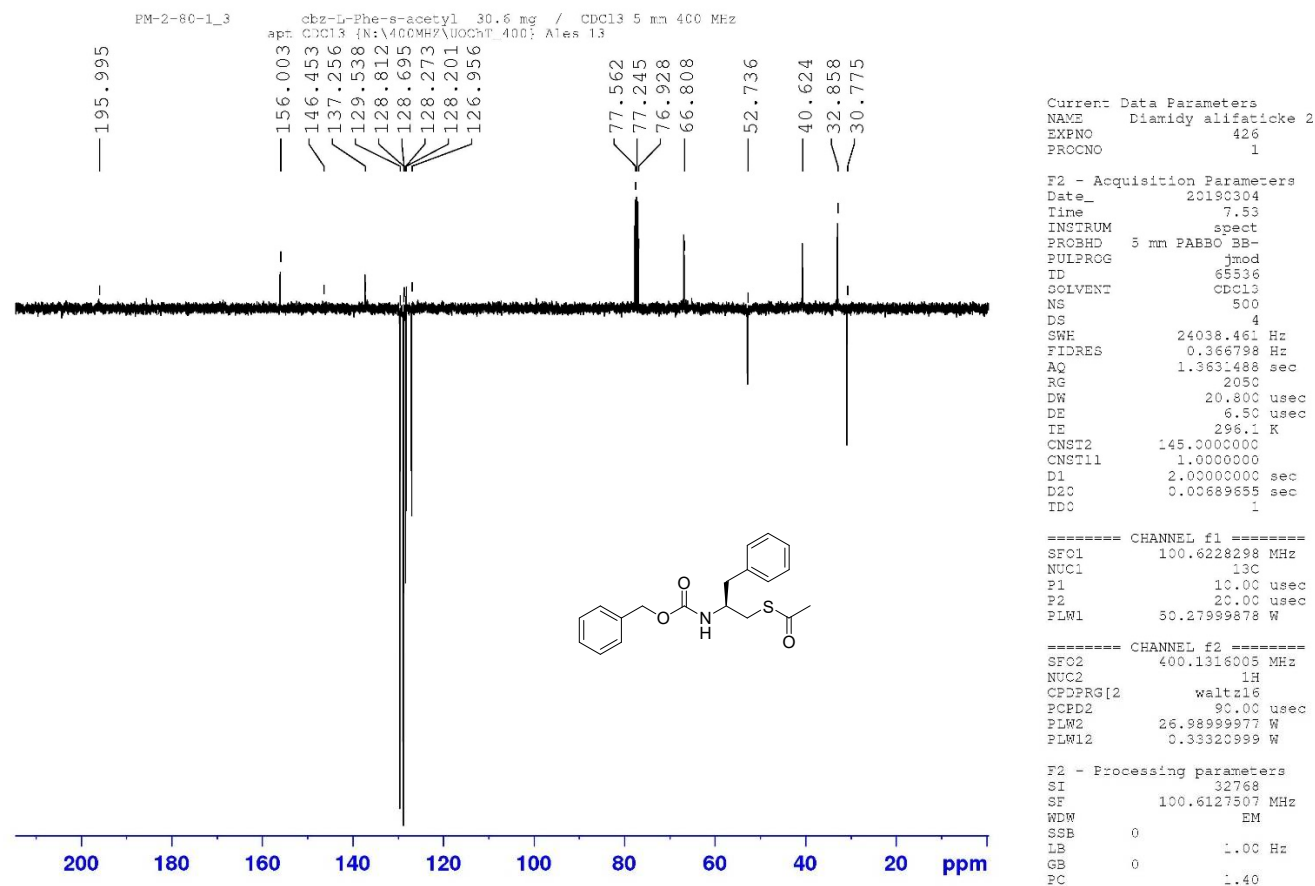

# 1.15. Copy of <sup>1</sup>H NMR of **4b**

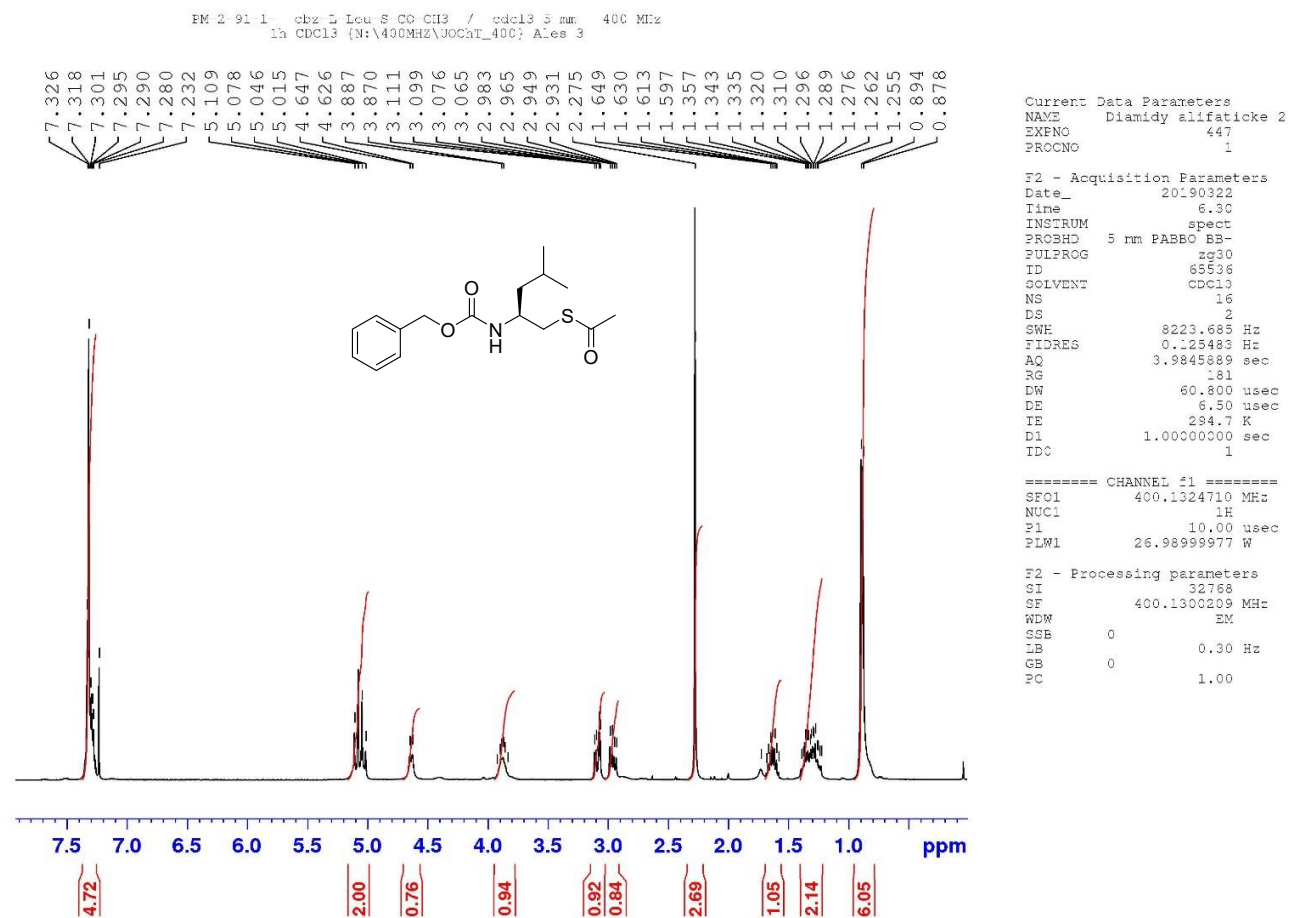

# 1.16. Copy of $^{13}\text{C}$ NMR of **4b**

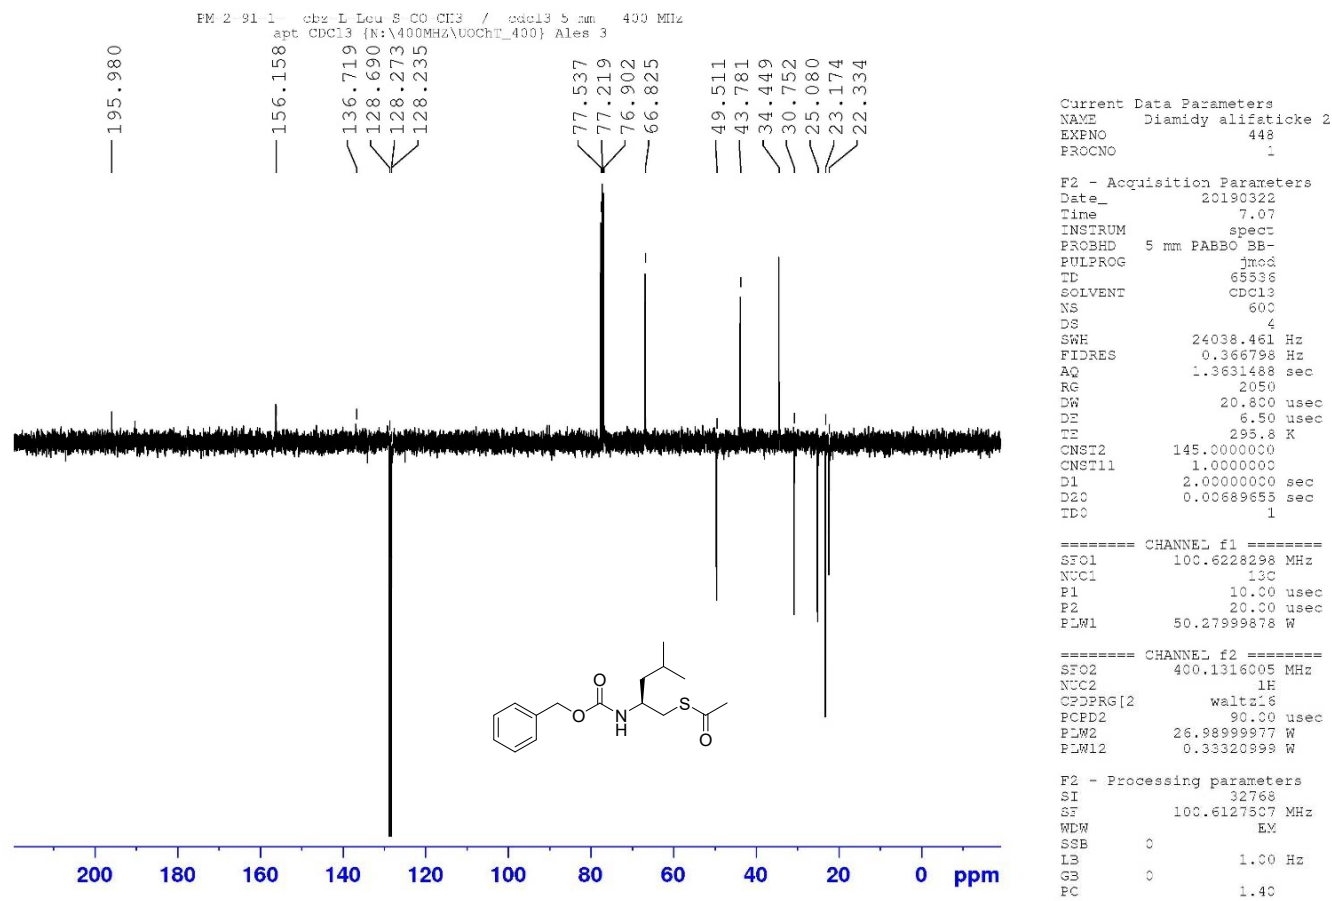

# 1.17. Copy of $^1\text{H}$ NMR of **4c**

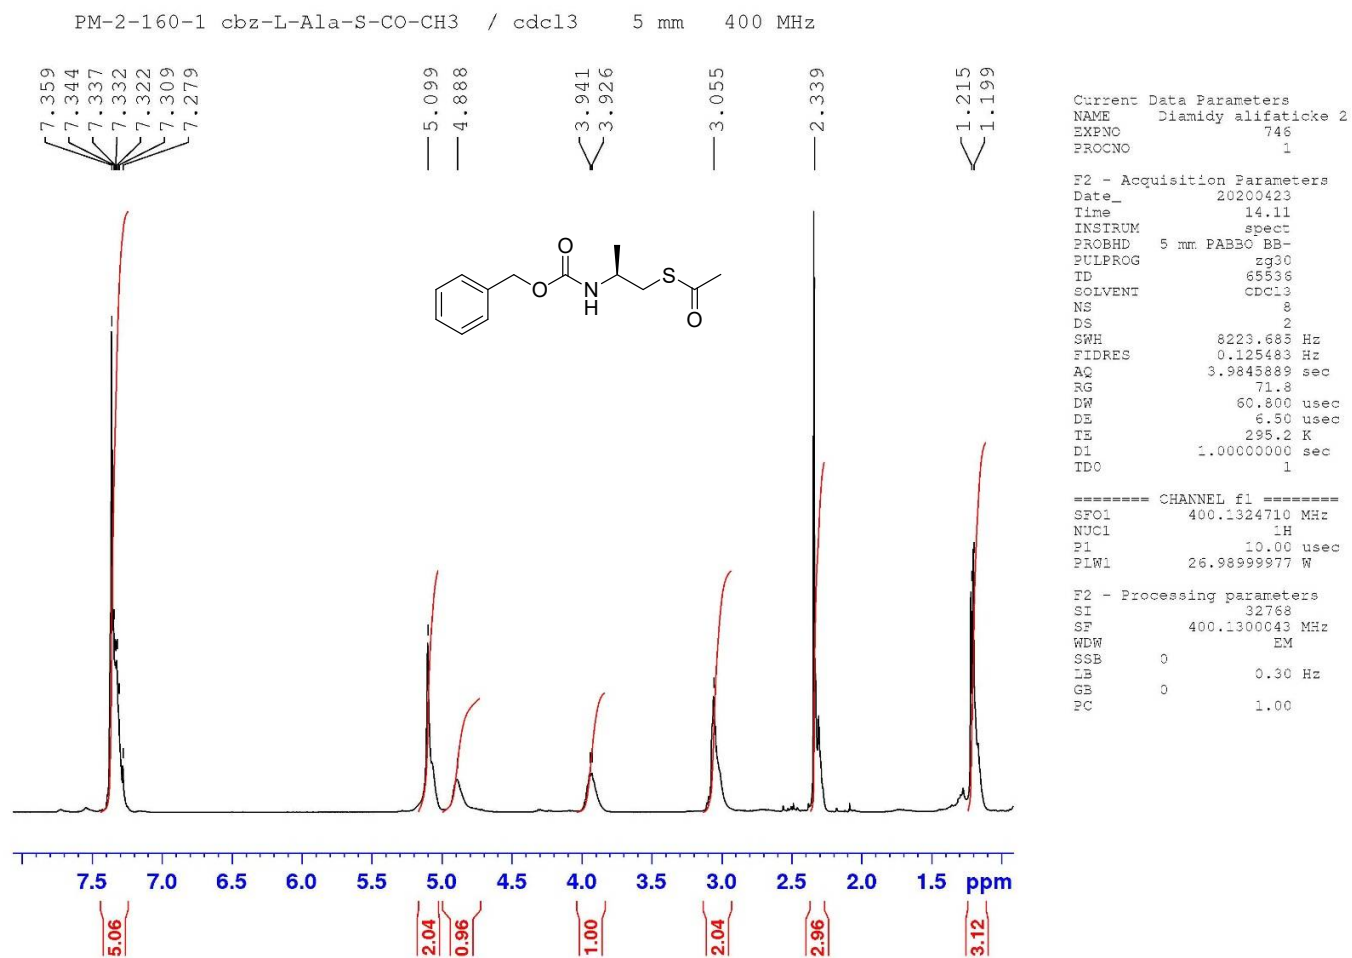



# 1.18. Copy of $^{13}\text{C}$ NMR of **4c**

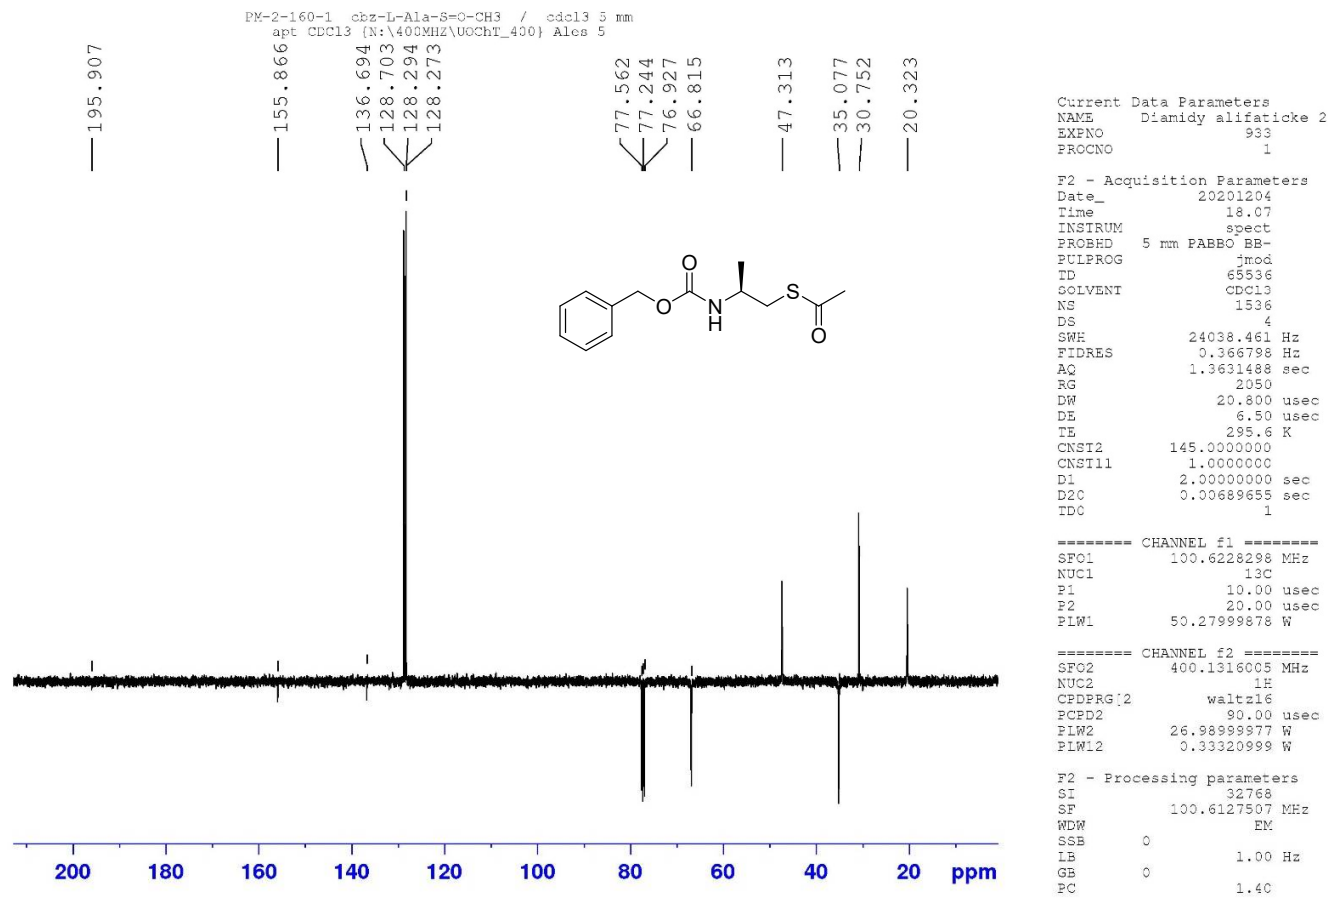

# 1.19. Copy of <sup>1</sup>H NMR of **5a**

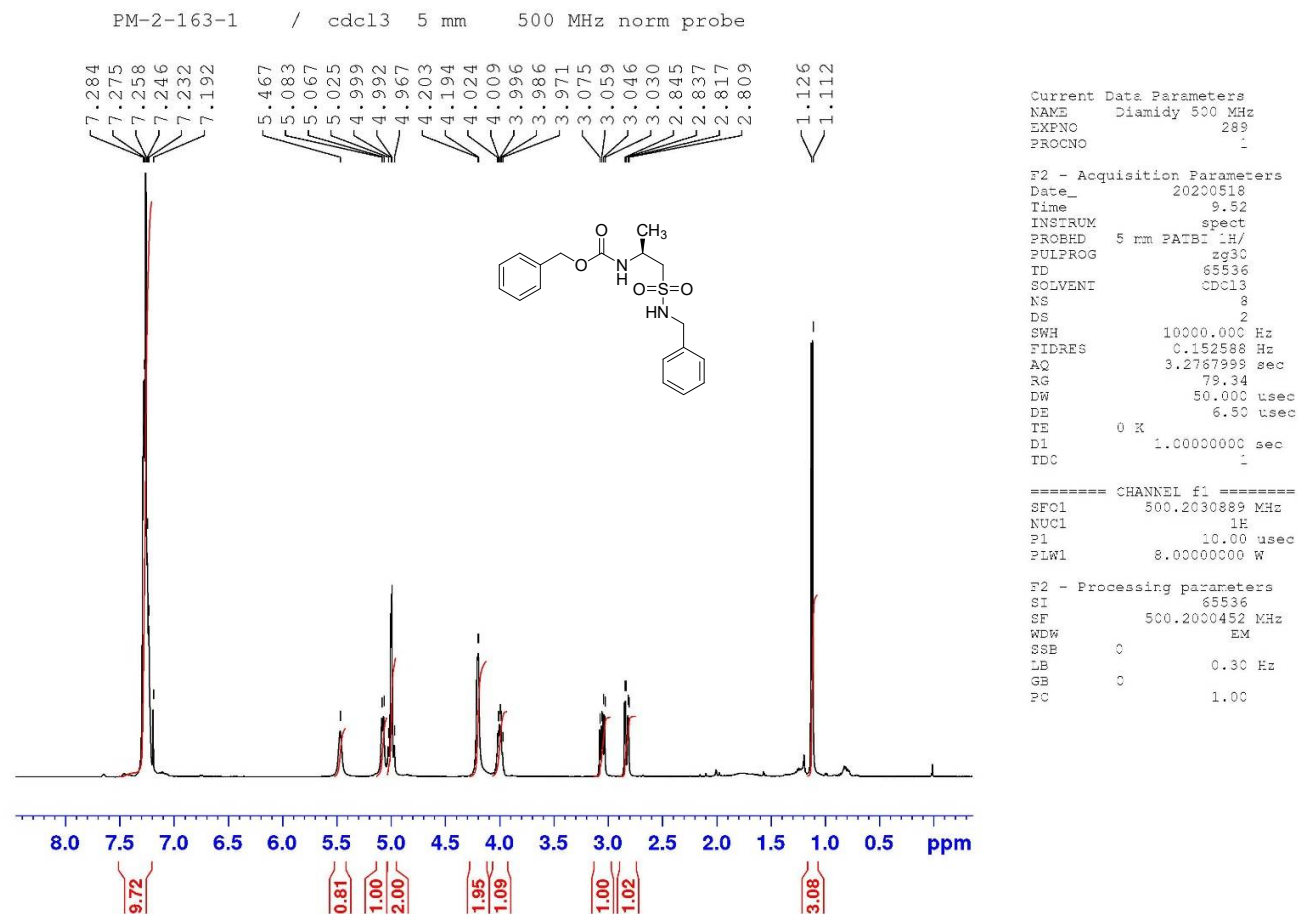

# 1.20. Copy of $^{13}\text{C}$ NMR of **5a**

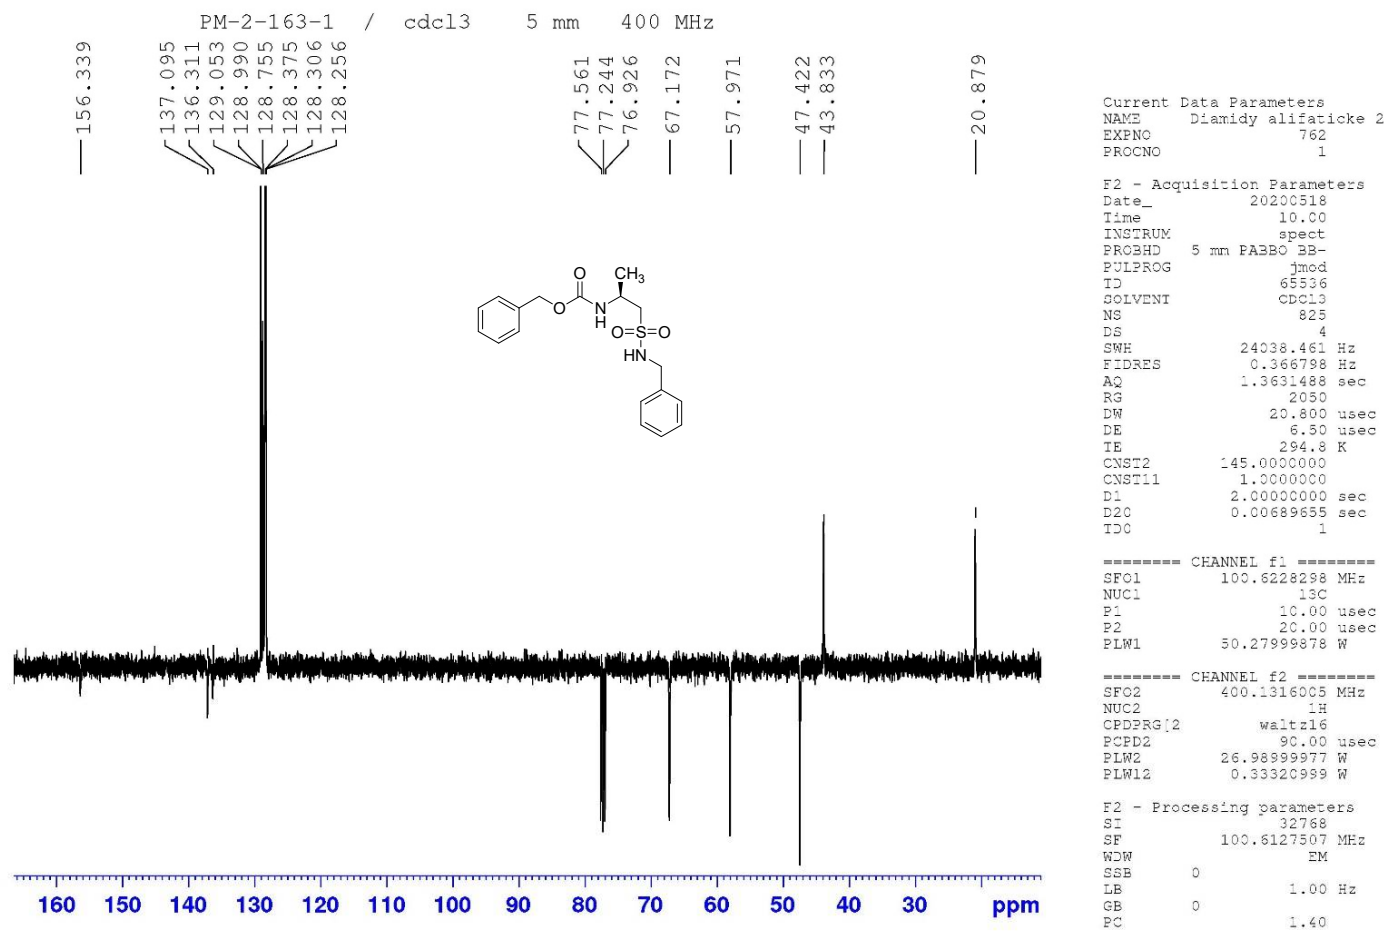

# 1.21. Copy of $^1\text{H}$ NMR of **5b**

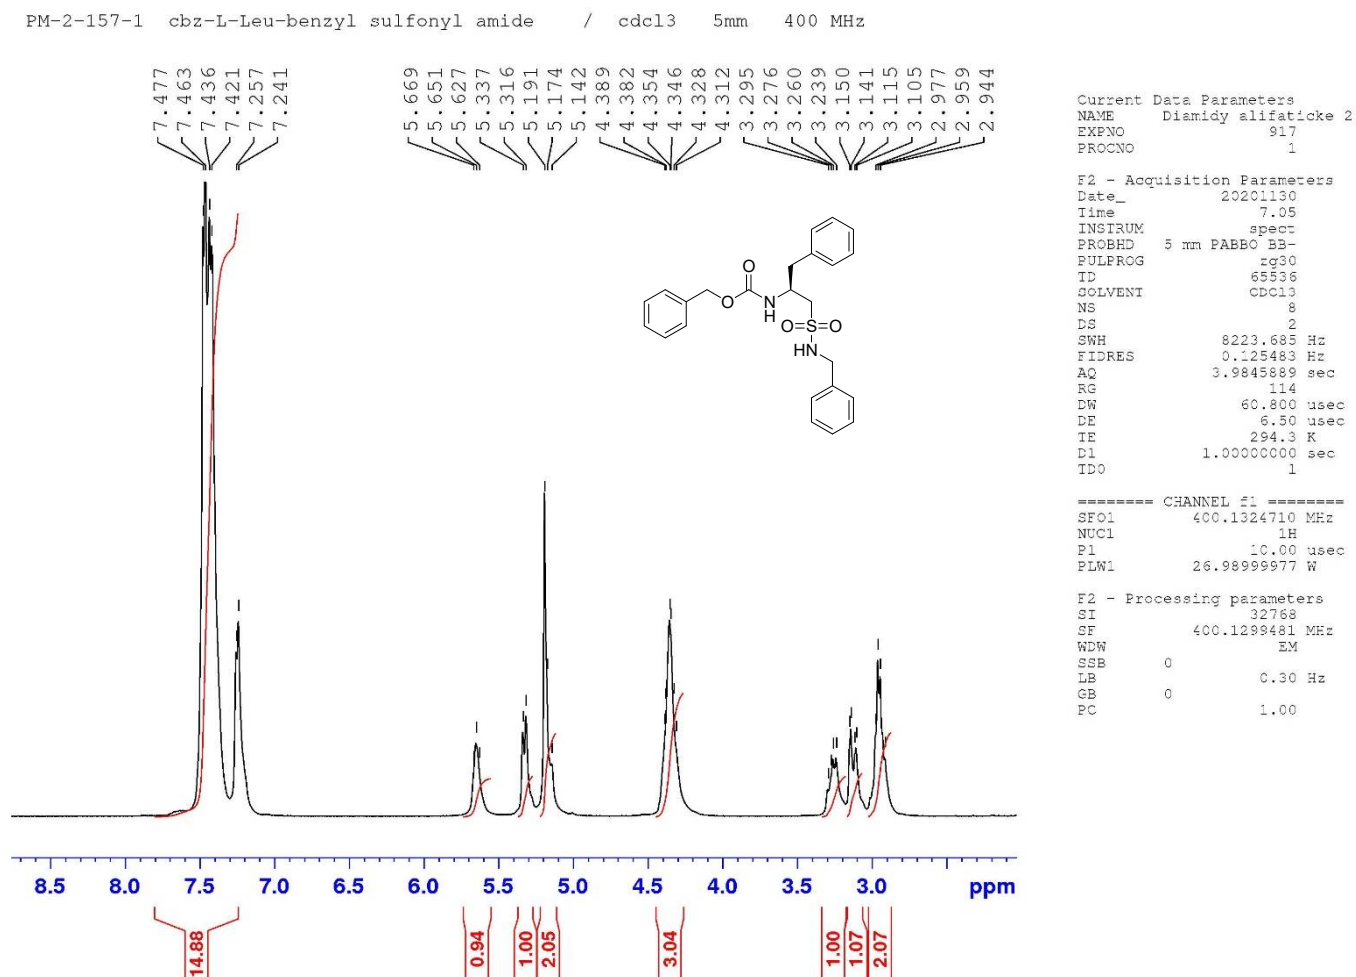

## 1.22. Copy of $^{13}\text{C}$ NMR of **5b**

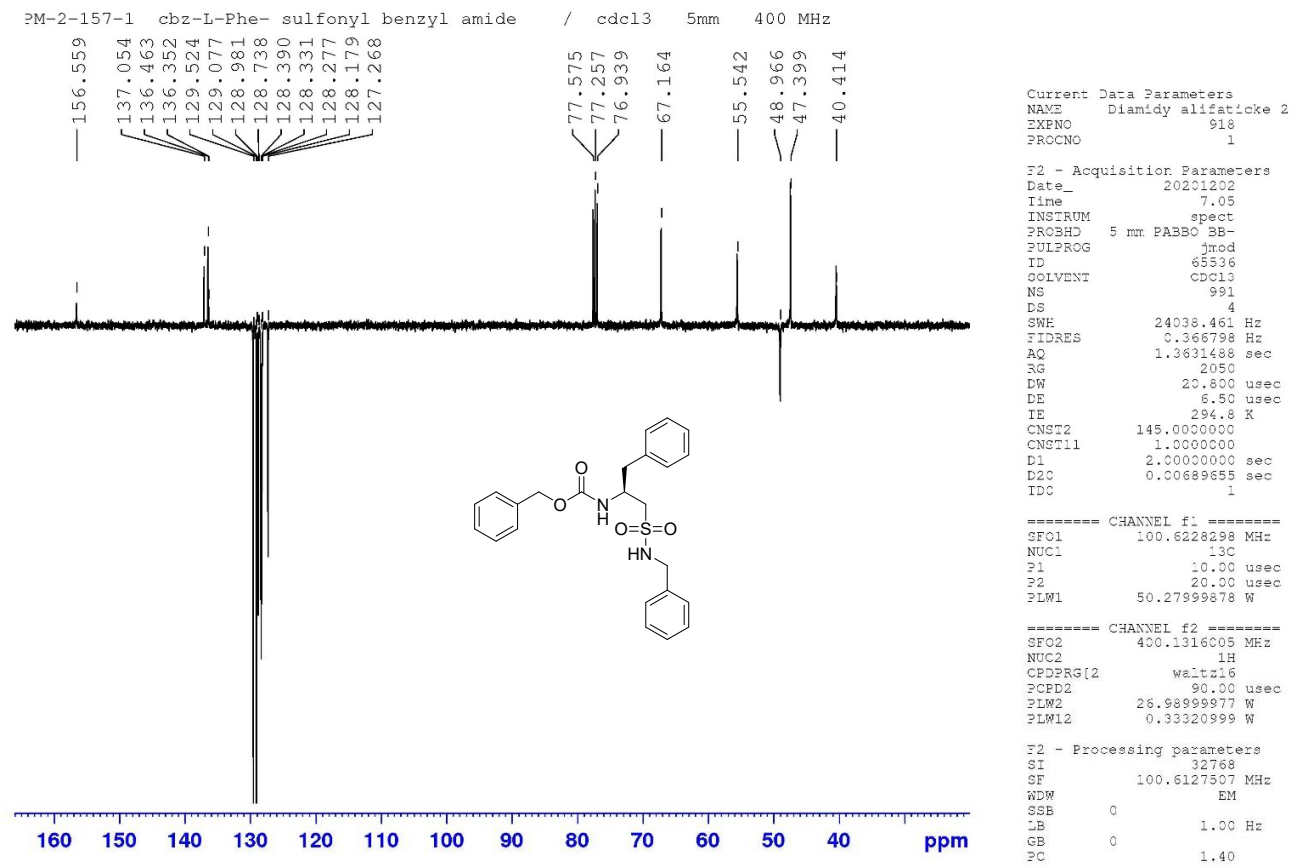

### 1.23. Copy of $^1\text{H}$ NMR of **5c**

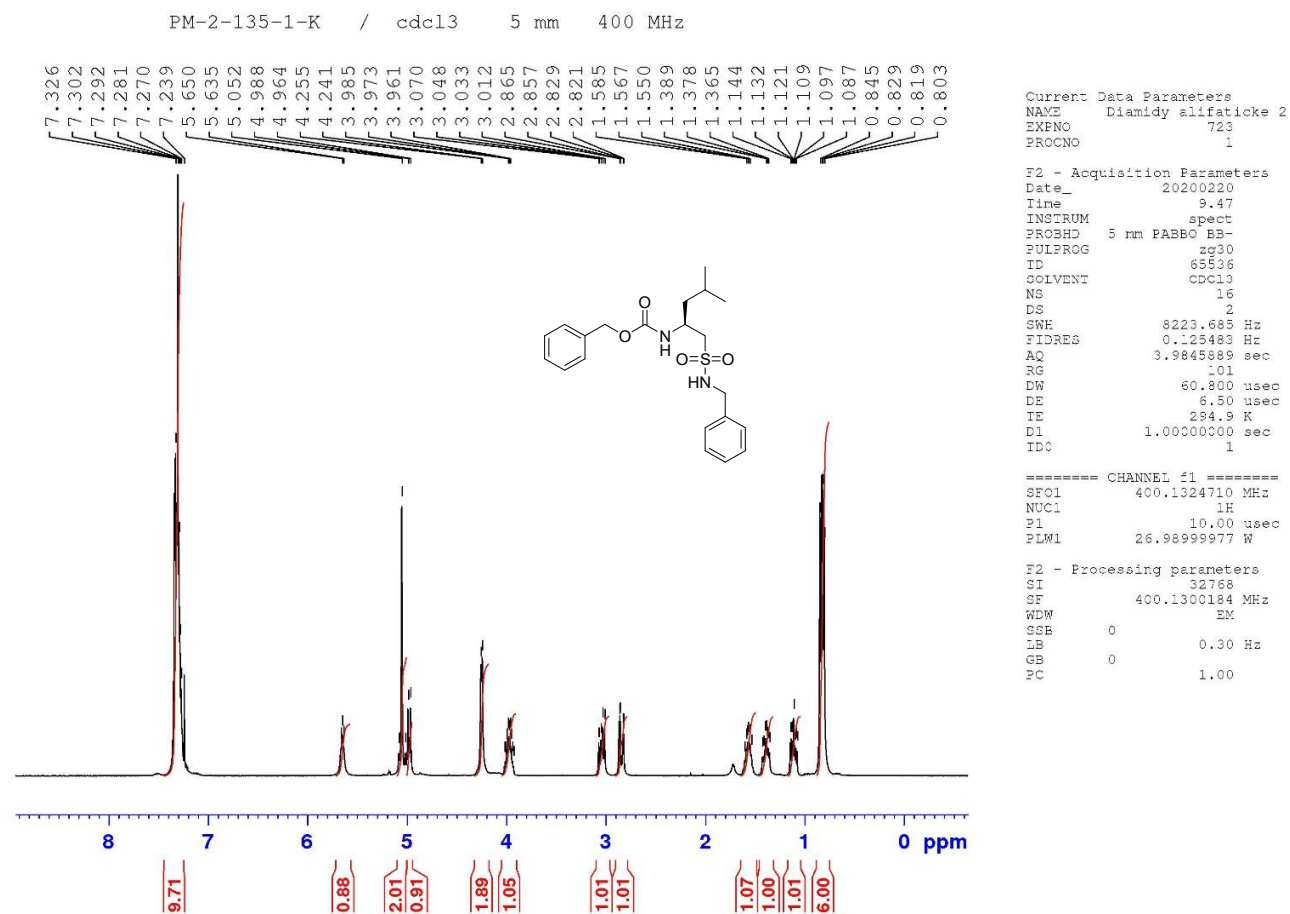

# 1.24. Copy of $^{13}\text{C}$ NMR of **5c**

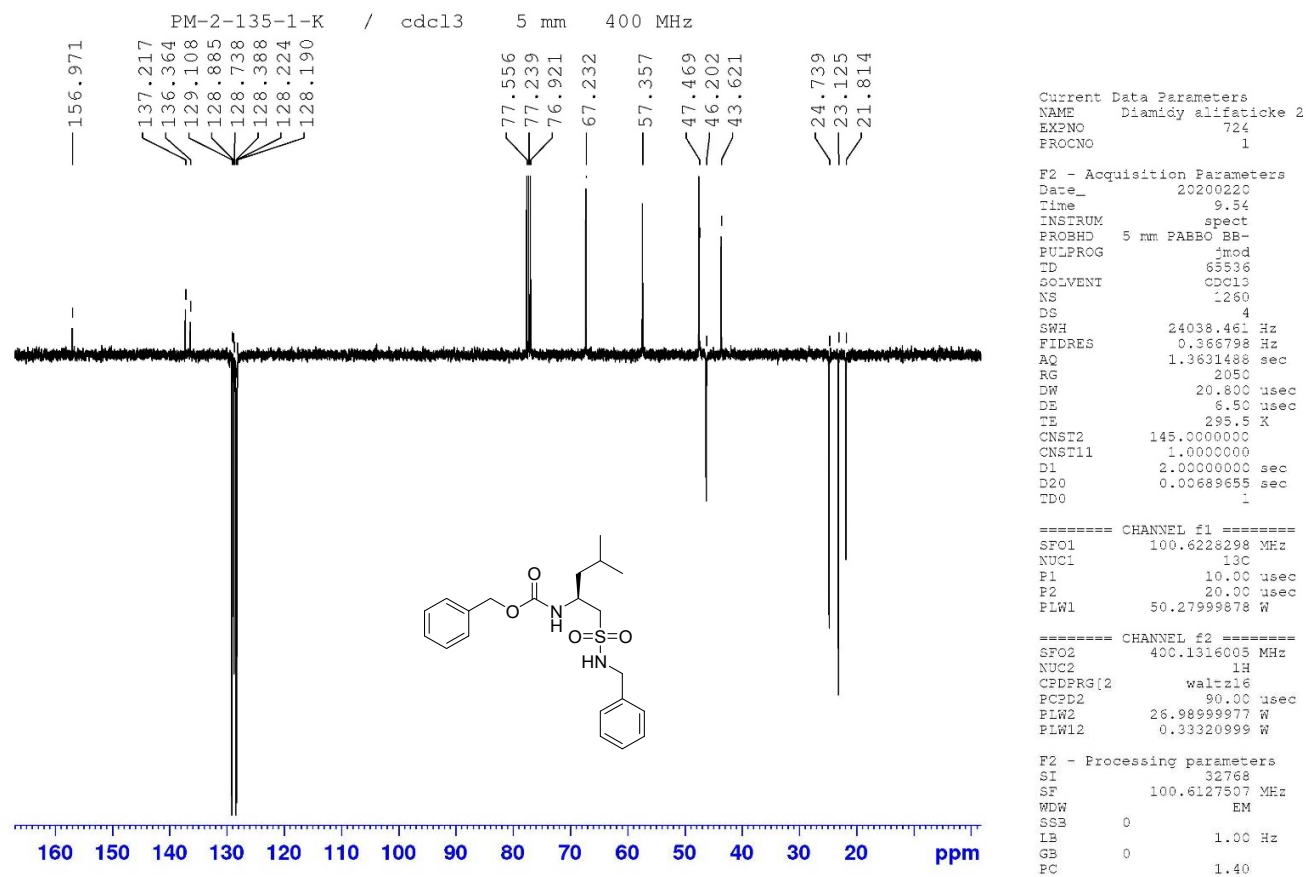

# 1.25. Copy of <sup>1</sup>H NMR of **5d**

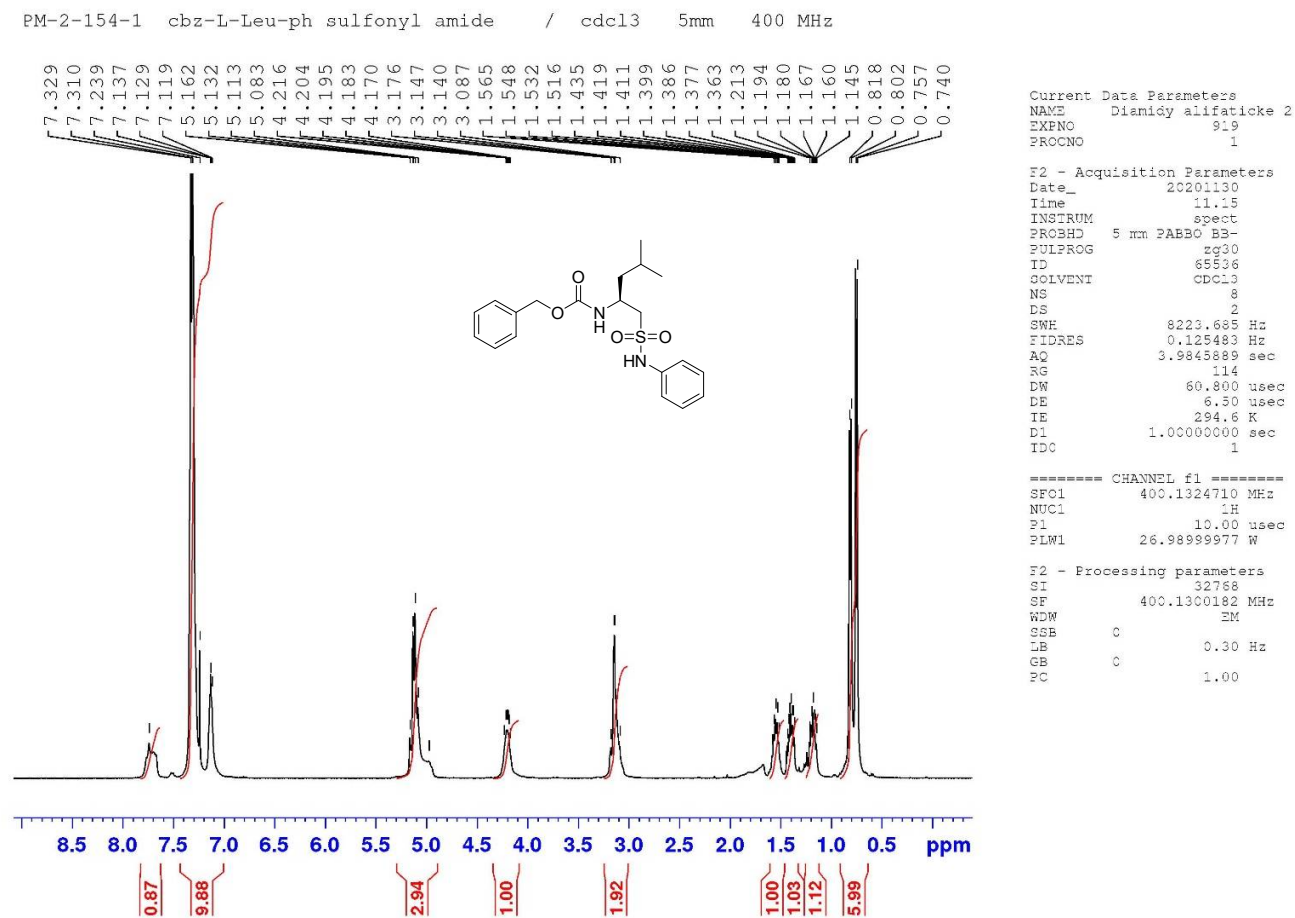



# 1.26. Copy of $^{13}\text{C}$ NMR of **5d**

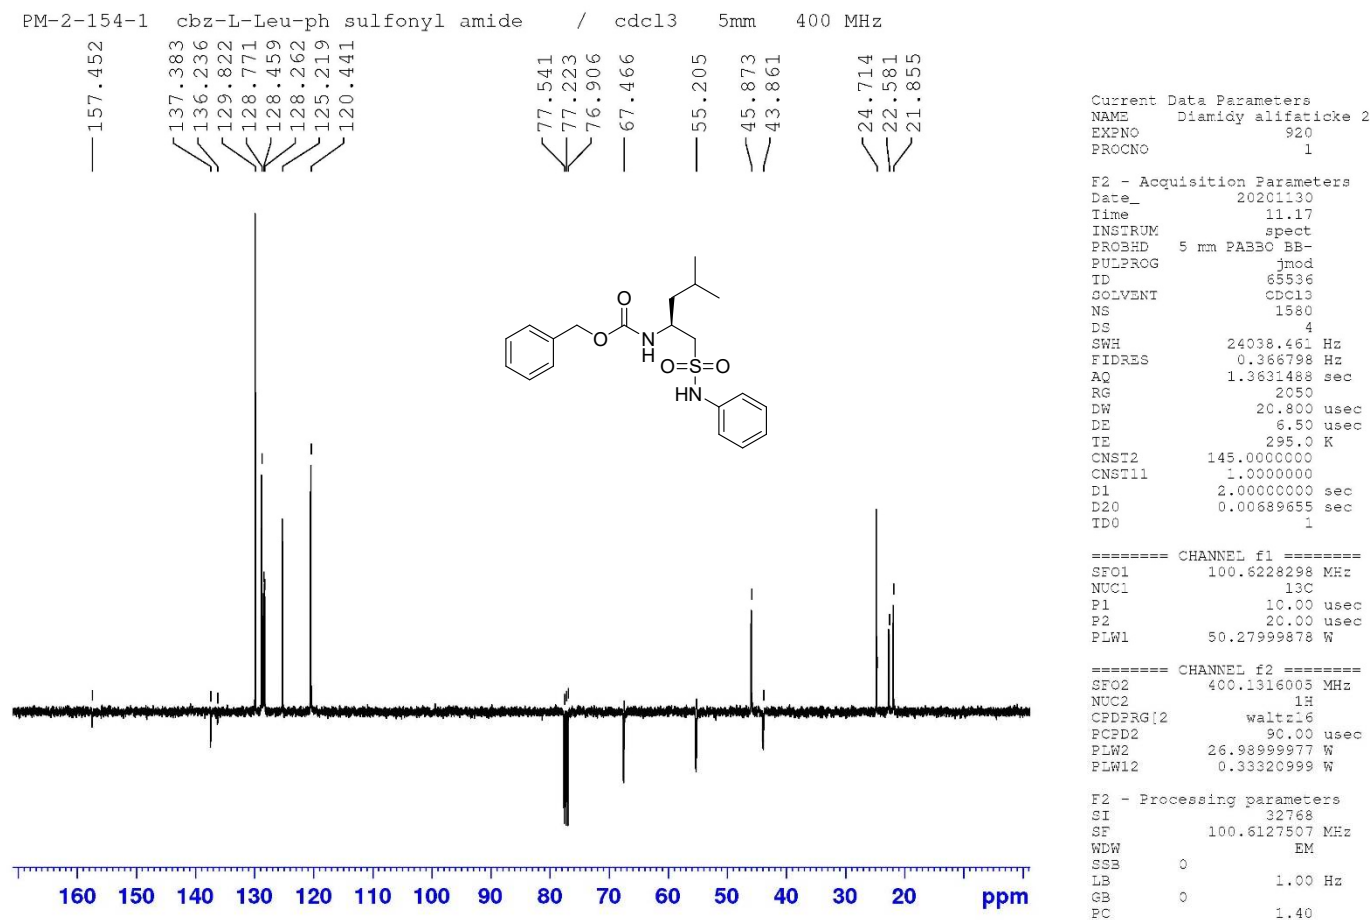

# 1.27. Copy of $^1\text{H}$ NMR of **5e**

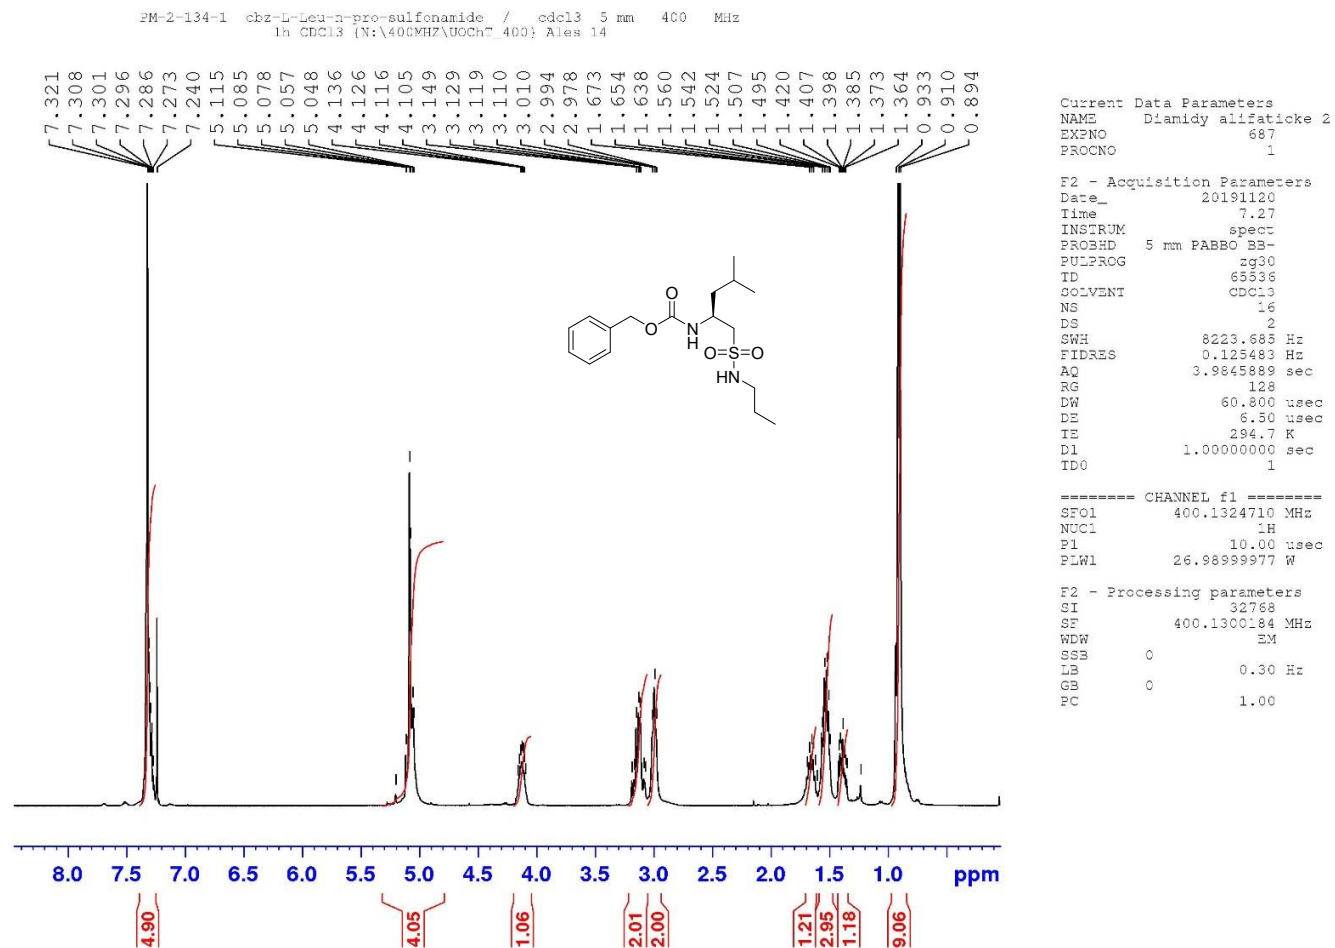

# 1.28. Copy of $^{13}\text{C}$ NMR of **5e**

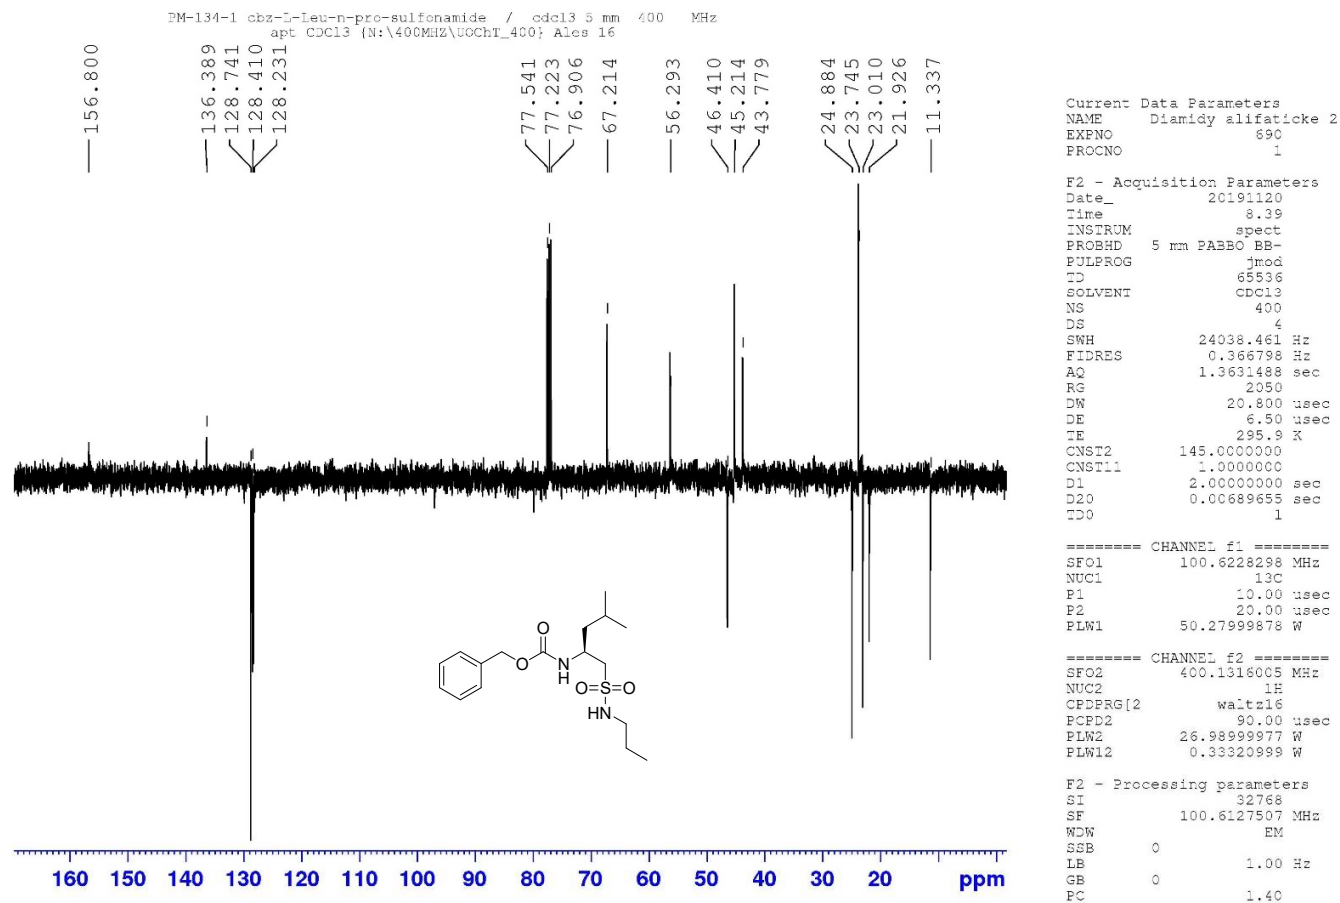

# 1.29. Copy of $^1\text{H}$ NMR of **5f**

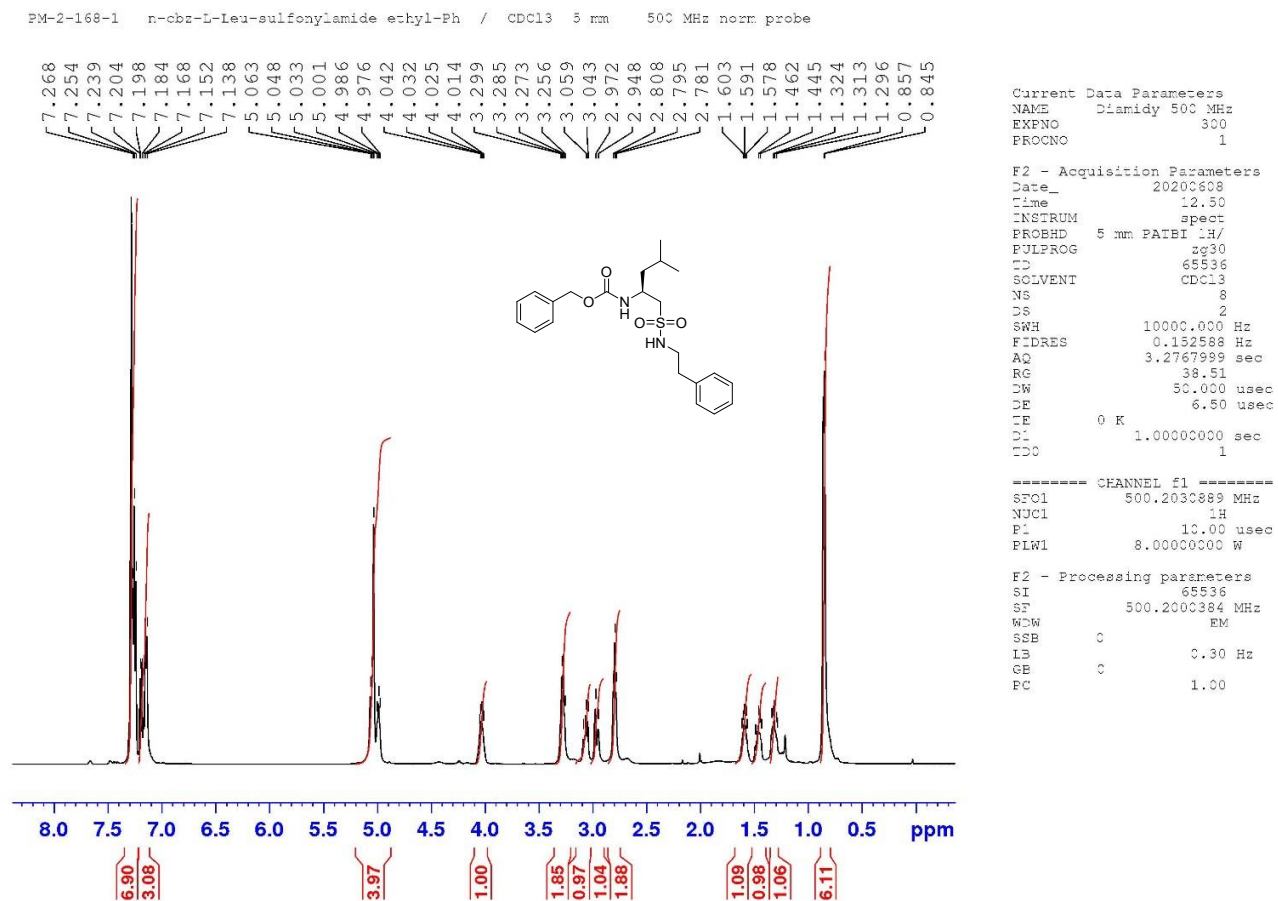

# 1.30. Copy of $^{13}\text{C}$ NMR of **5f**

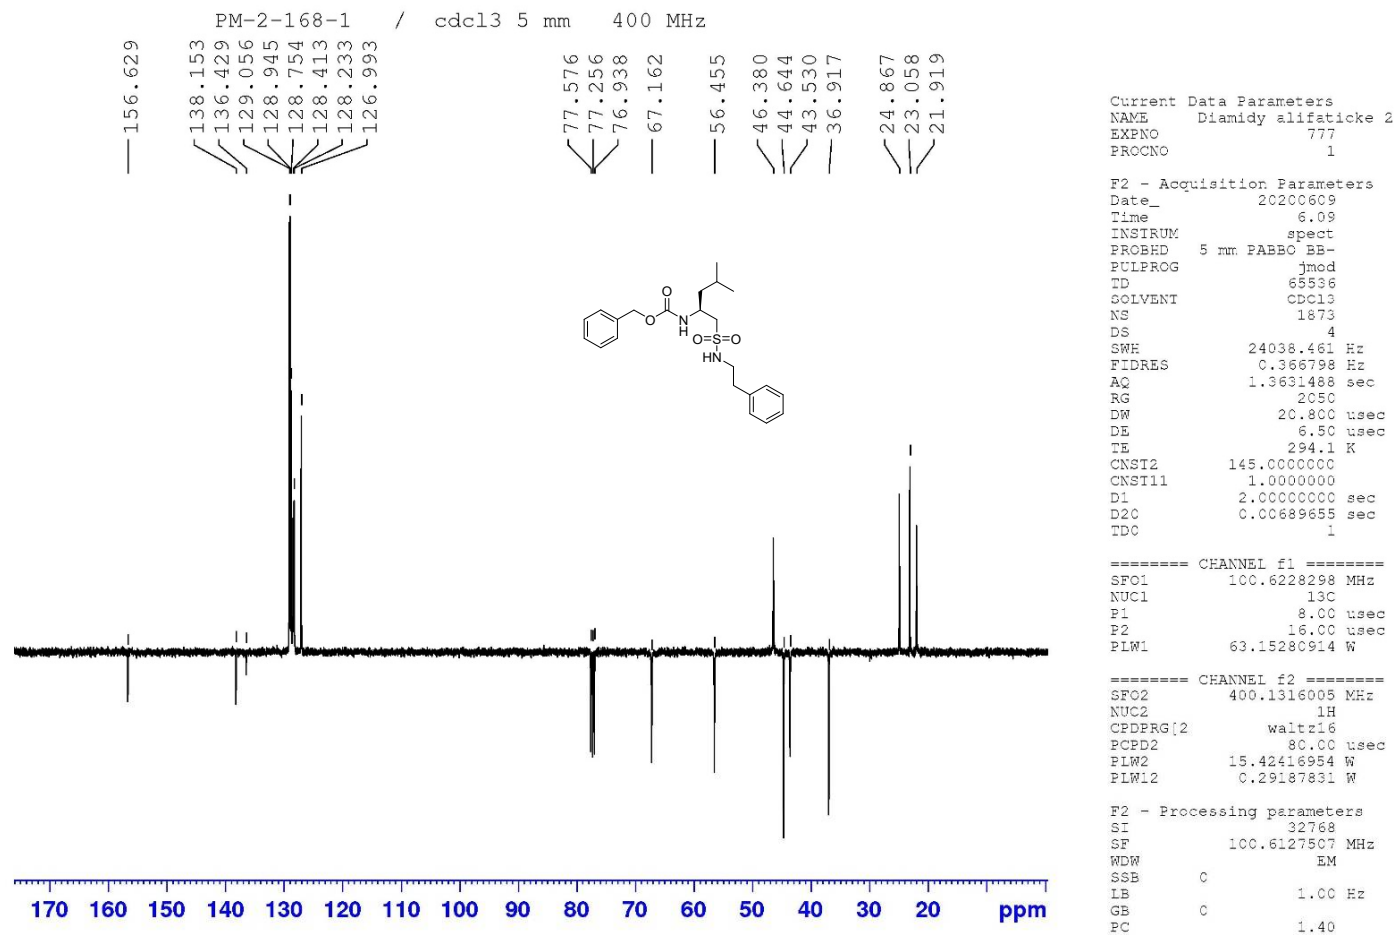

# 1.31. Copy of $^1\text{H}$ NMR of **5g**

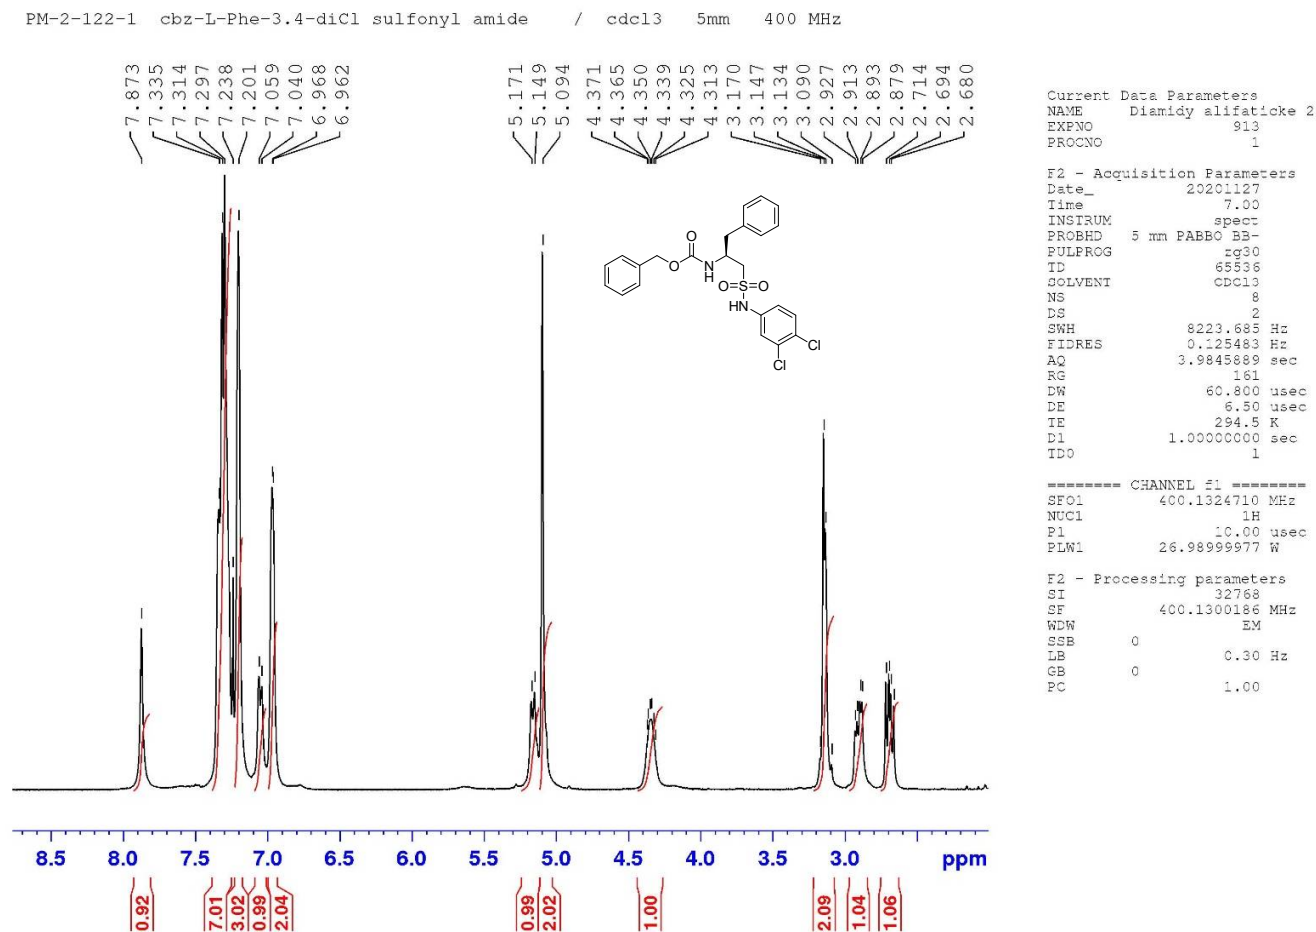

1.32. Copy of  $^{13}\text{C}$  NMR of **5g**

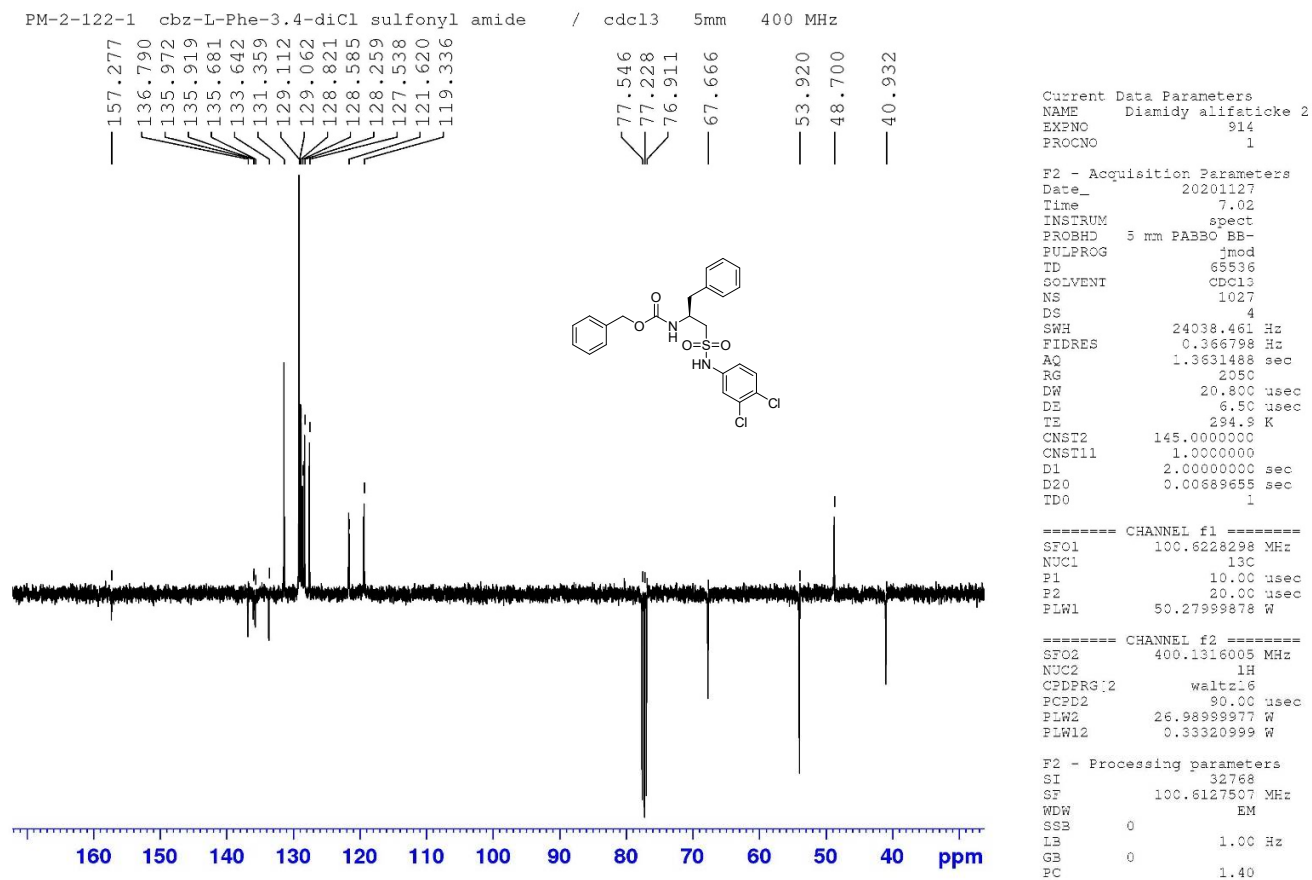

### 1.33. Copy of $^1\text{H}$ NMR of **5h**

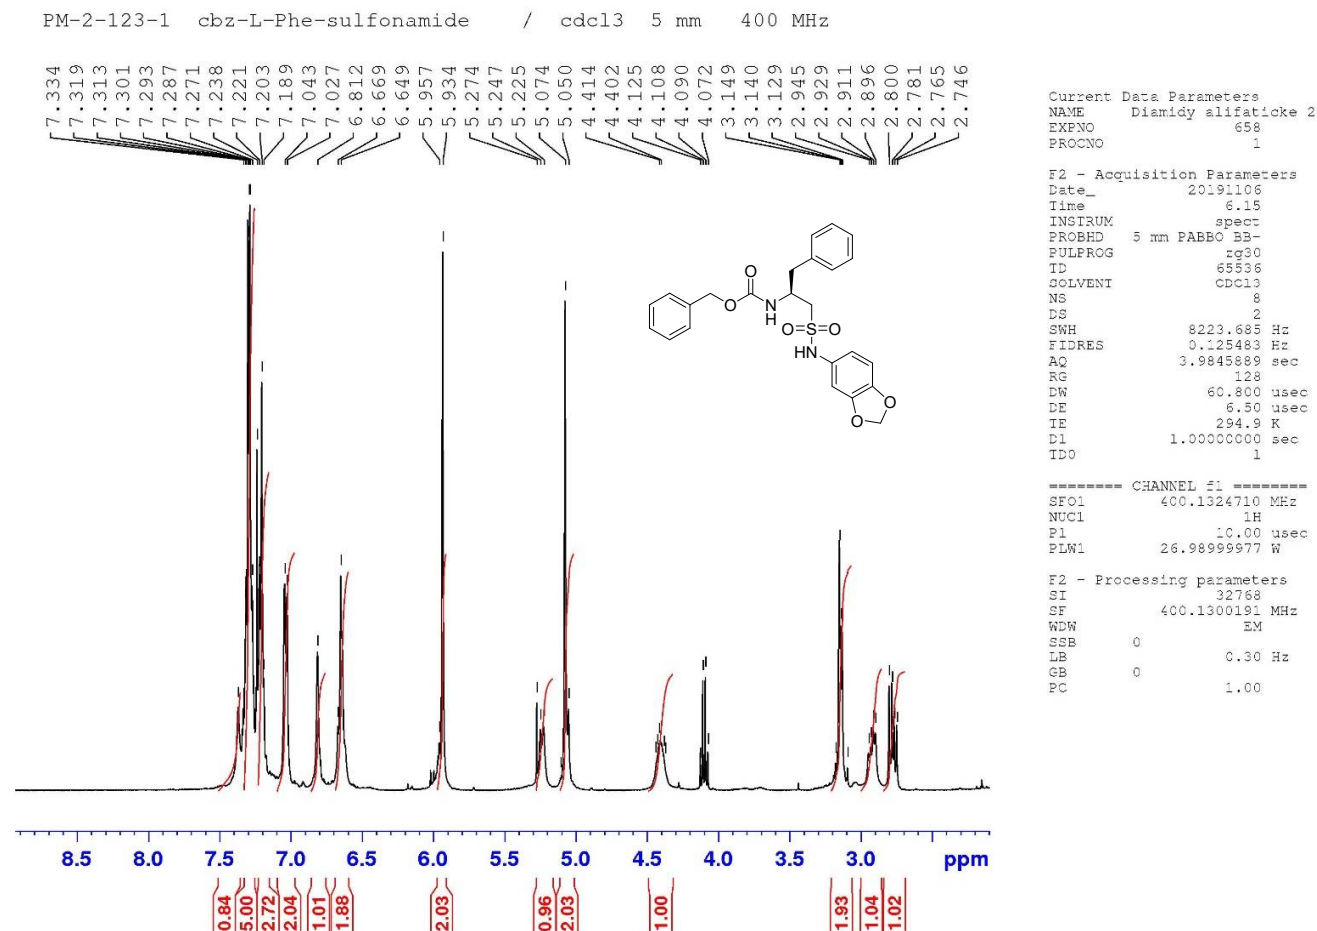



# 1.34. Copy of $^{13}\text{C}$ NMR of **5h**

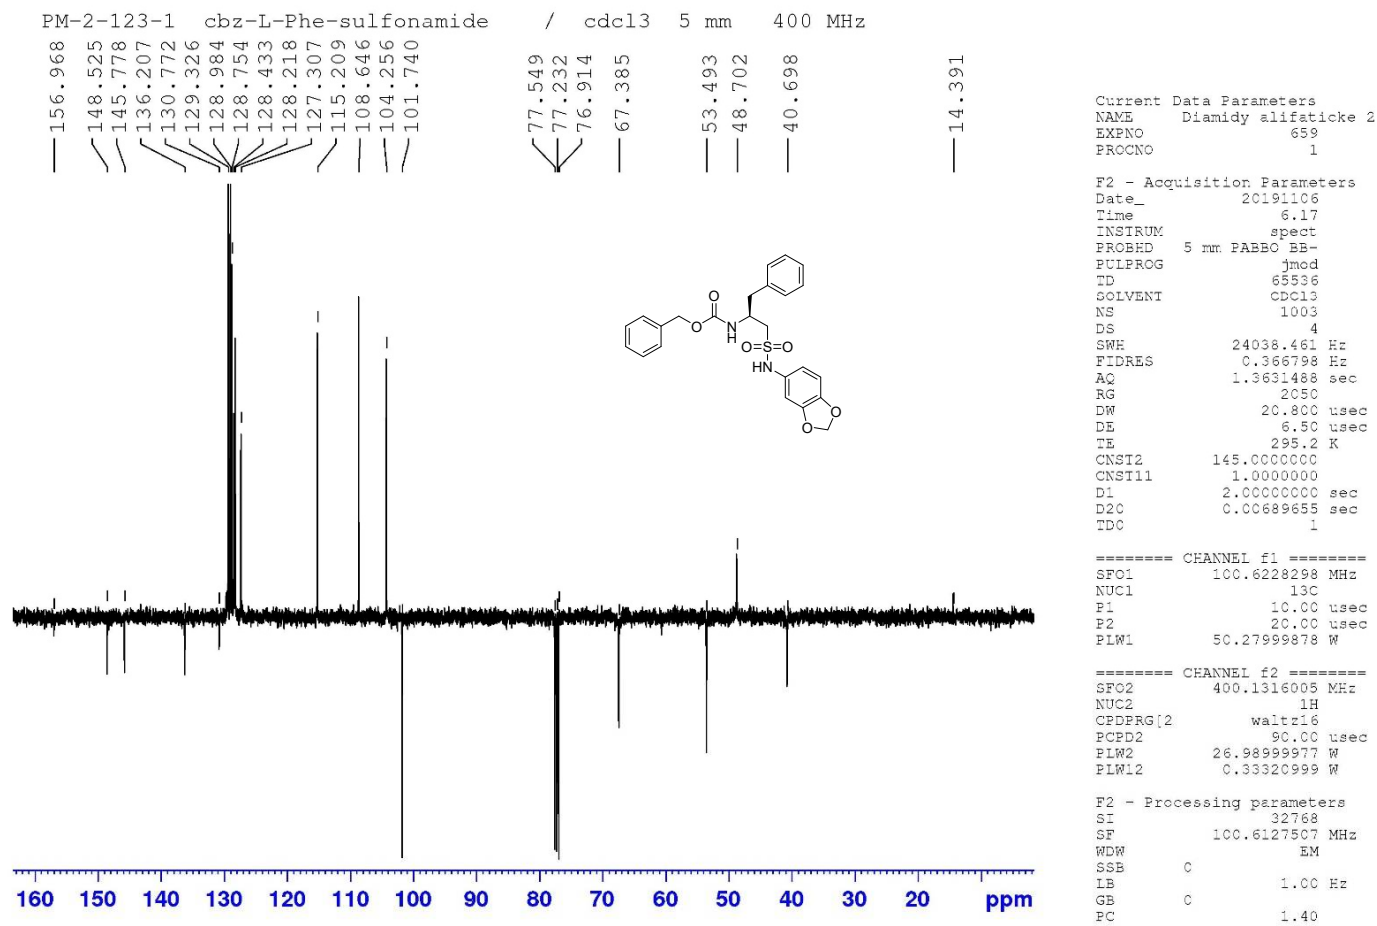

# 1.35. Copy of $^1\text{H}$ NMR of **5i**

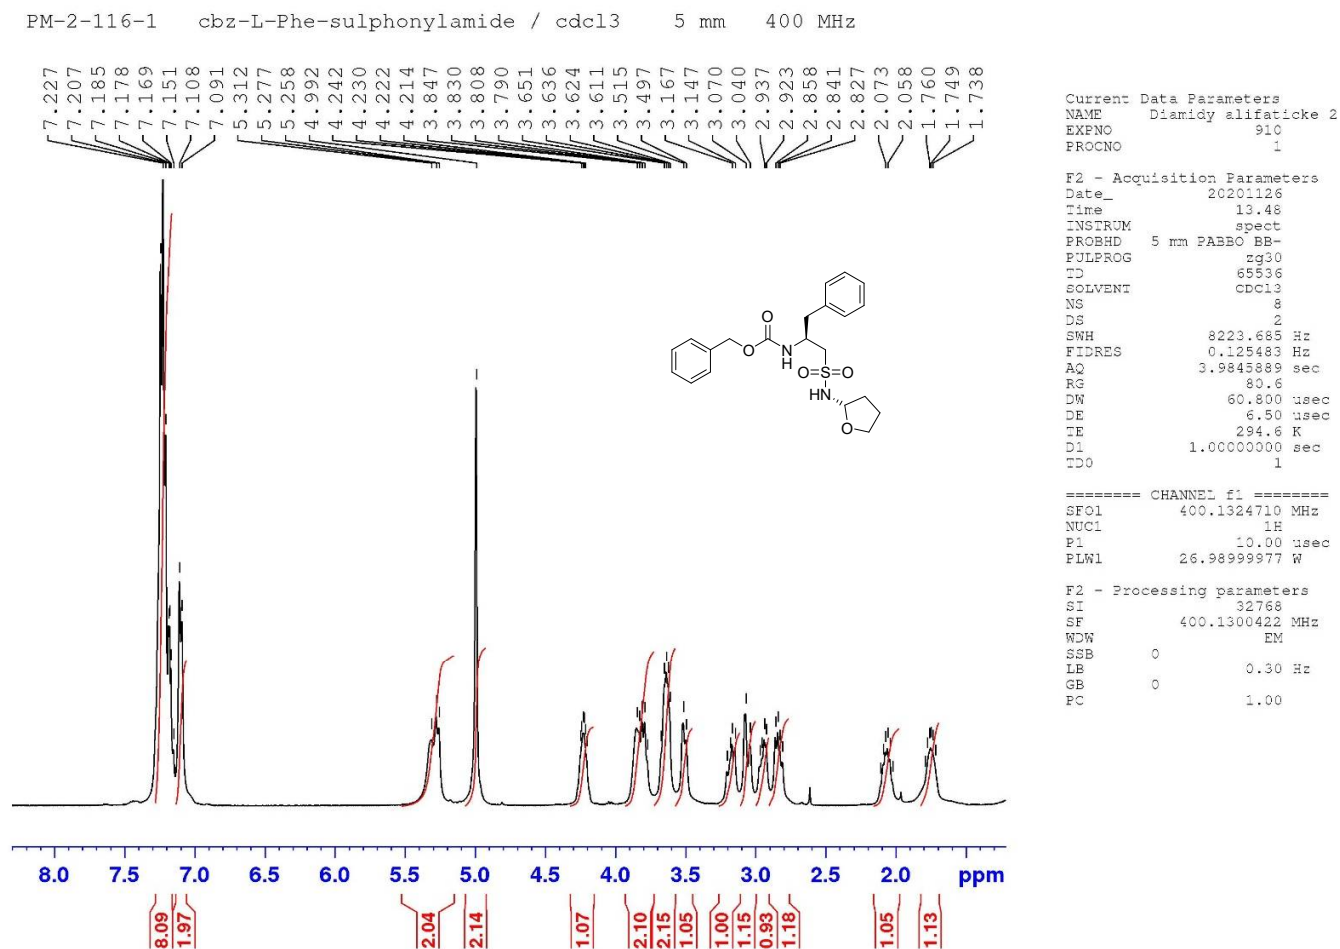

# 1.36. Copy of $^{13}\text{C}$ NMR of **5i**

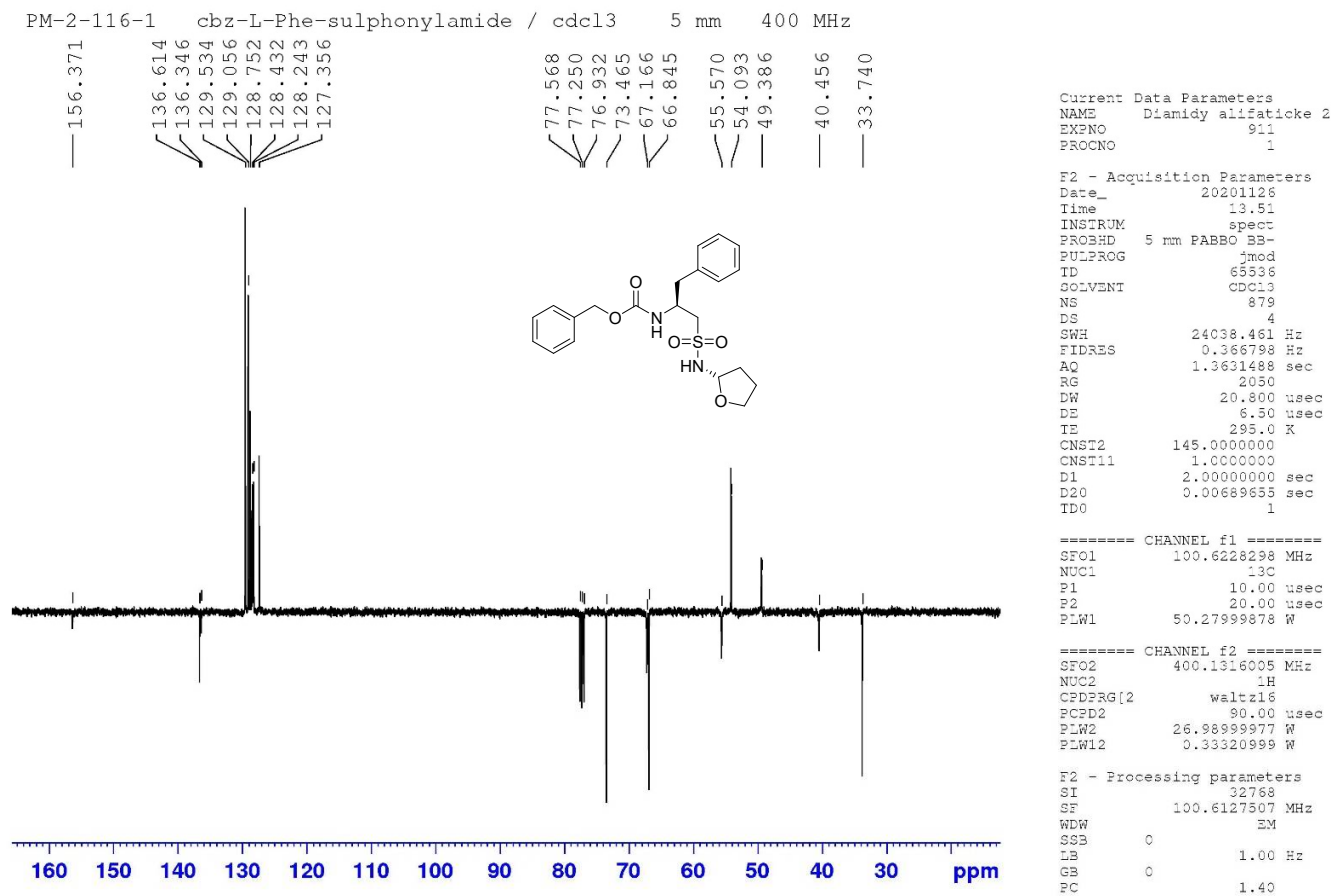

# 1.37. Copy of $^1\text{H}$ NMR of **5j**

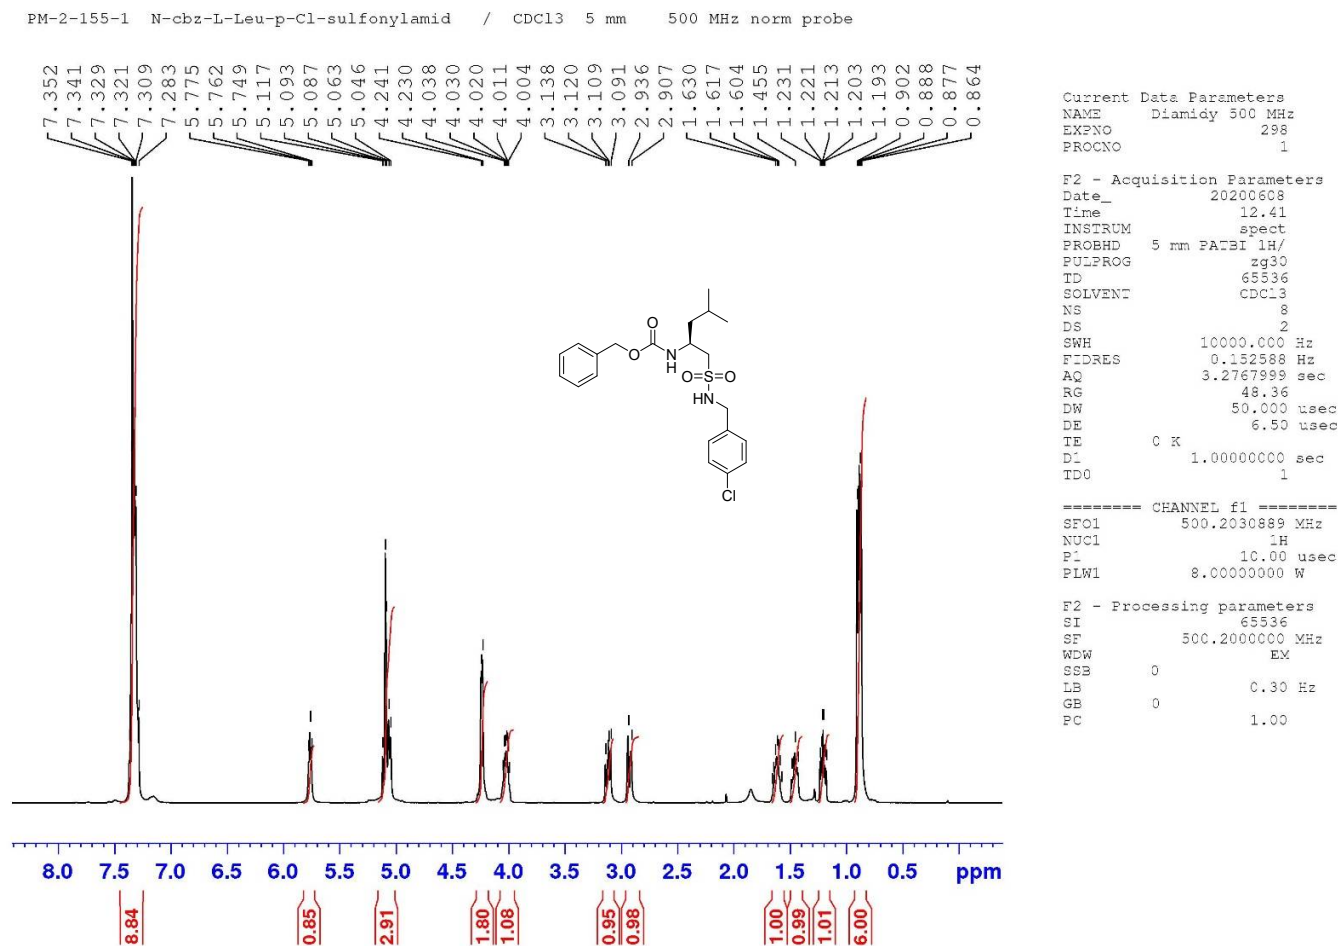

1.38. Copy of  $^{13}\text{C}$  NMR of **5j**

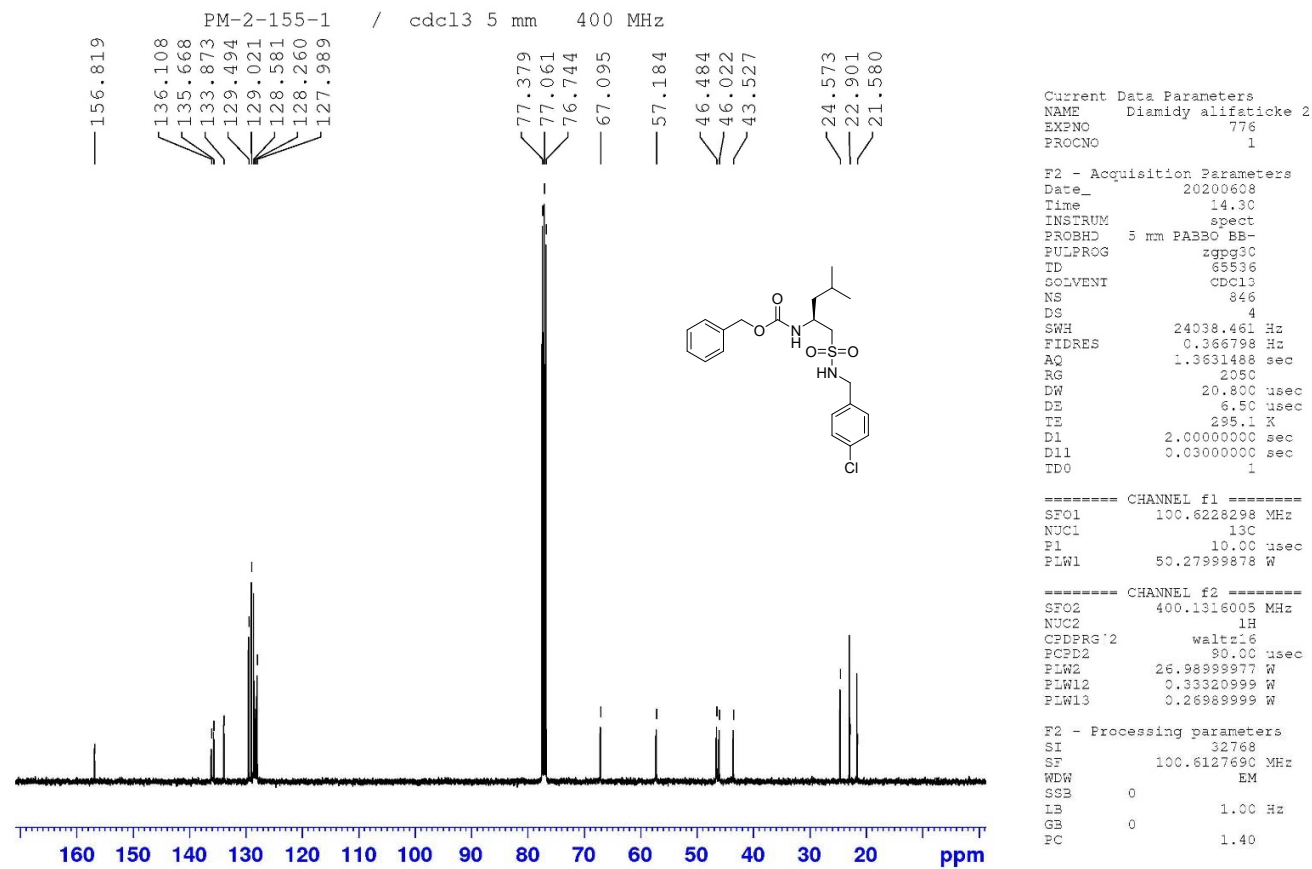

1.39. Copy of  $^1\text{H}$  NMR of **5k**

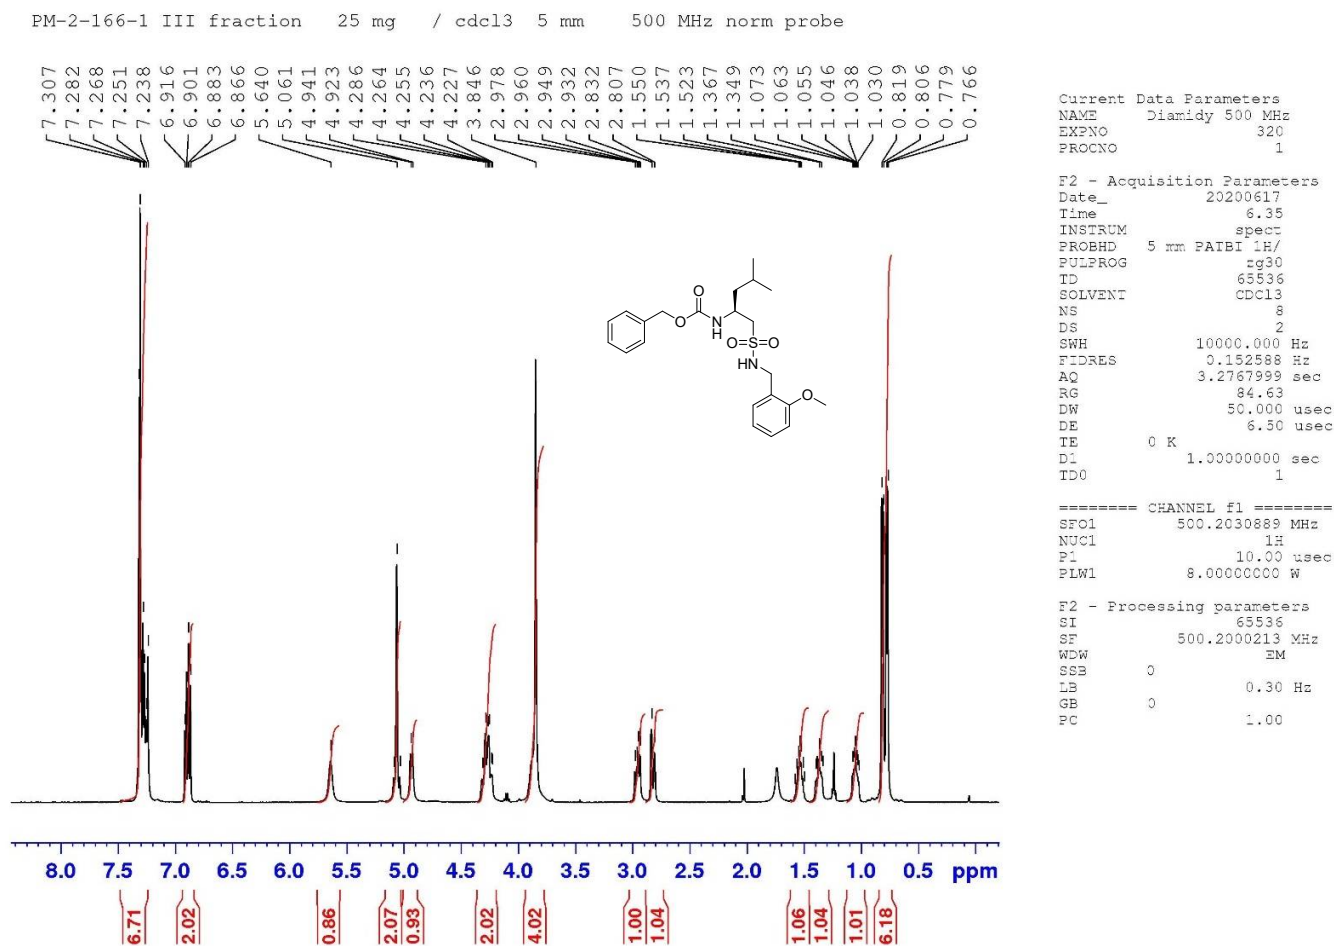

# 1.40. Copy of $^{13}\text{C}$ NMR of **5k**

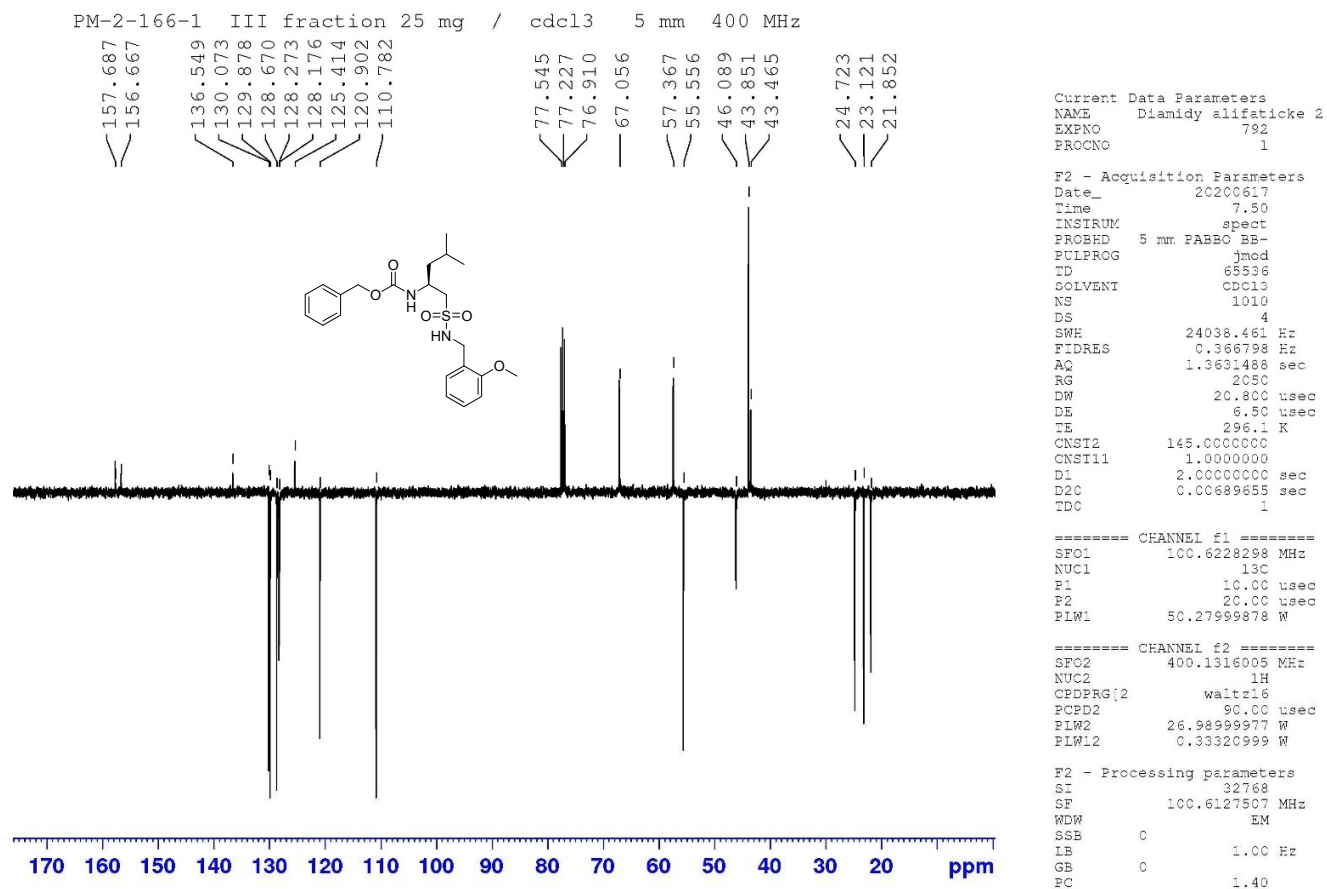

# 1.41. Copy of $^1\text{H}$ NMR of **5l**

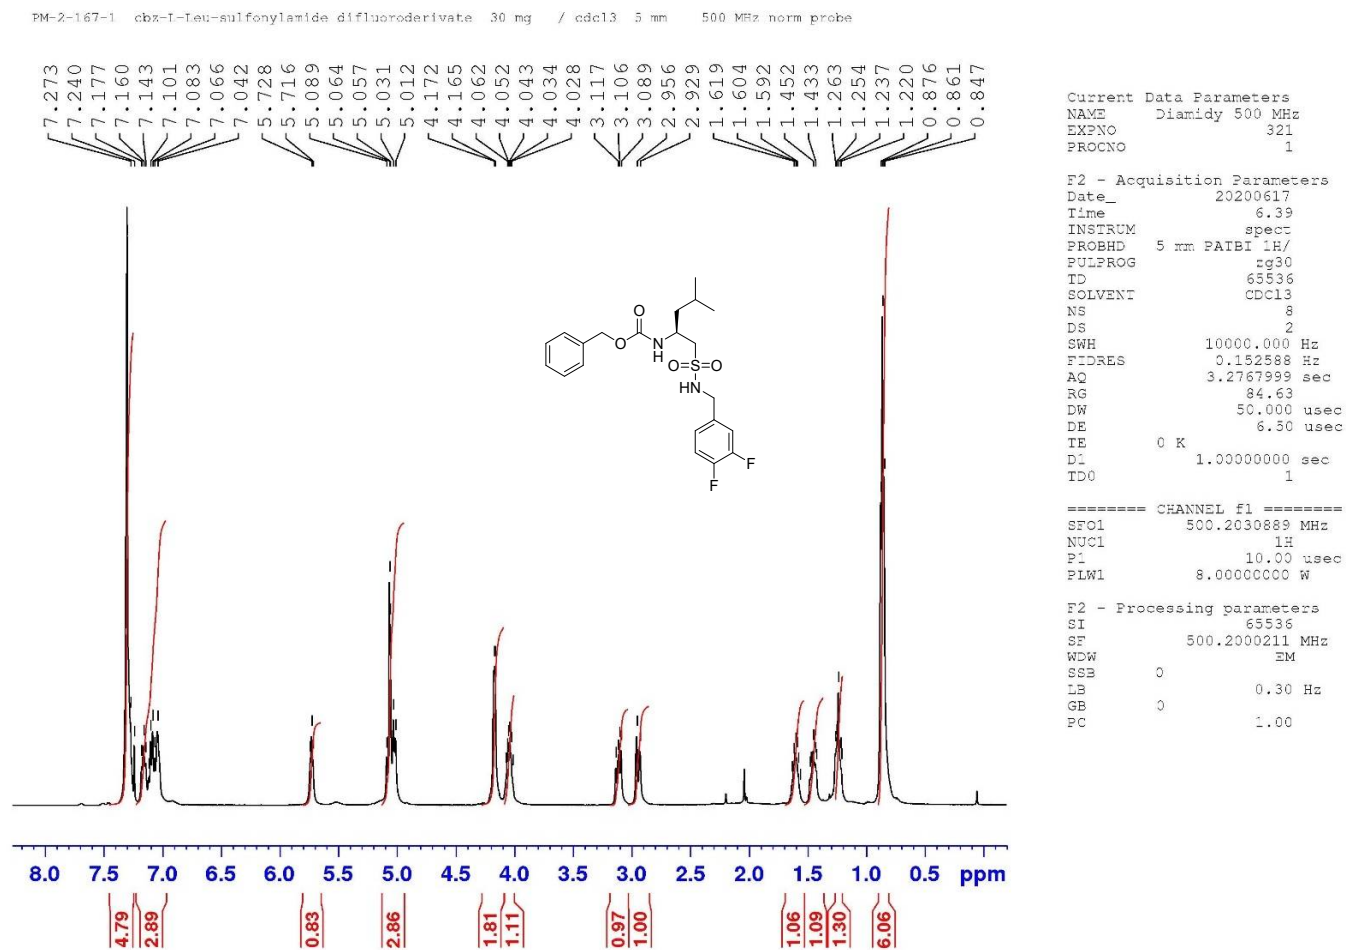



1.42. Copy of  $^{13}\text{C}$  NMR of **5l**

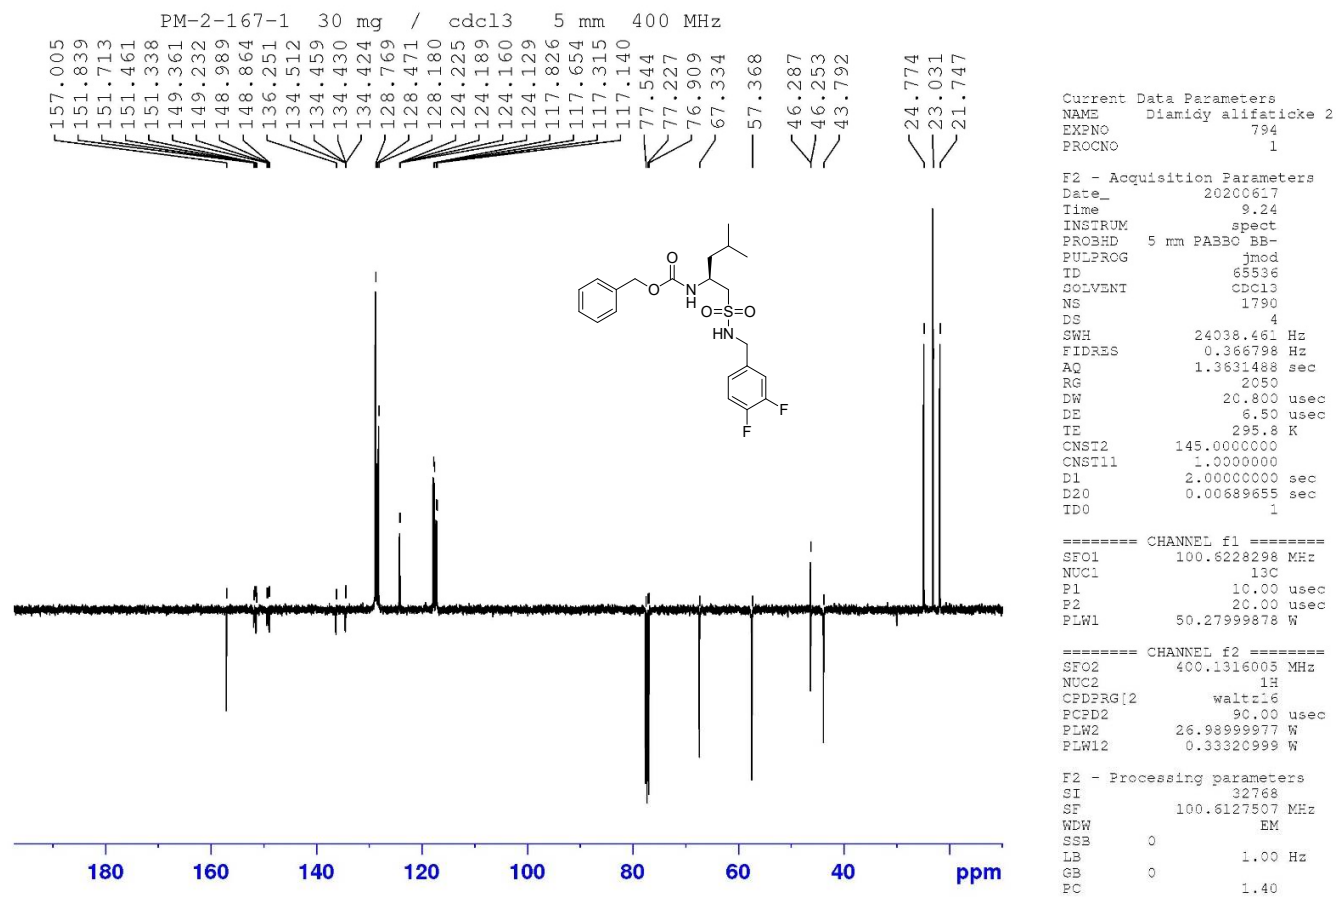

# 1.43. Copy of $^{19}\text{F}$ NMR of **5I**

PM-2-167-1 30 mg /  $\text{cdcl}_3$  5 mm 400 MHz

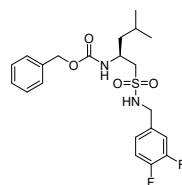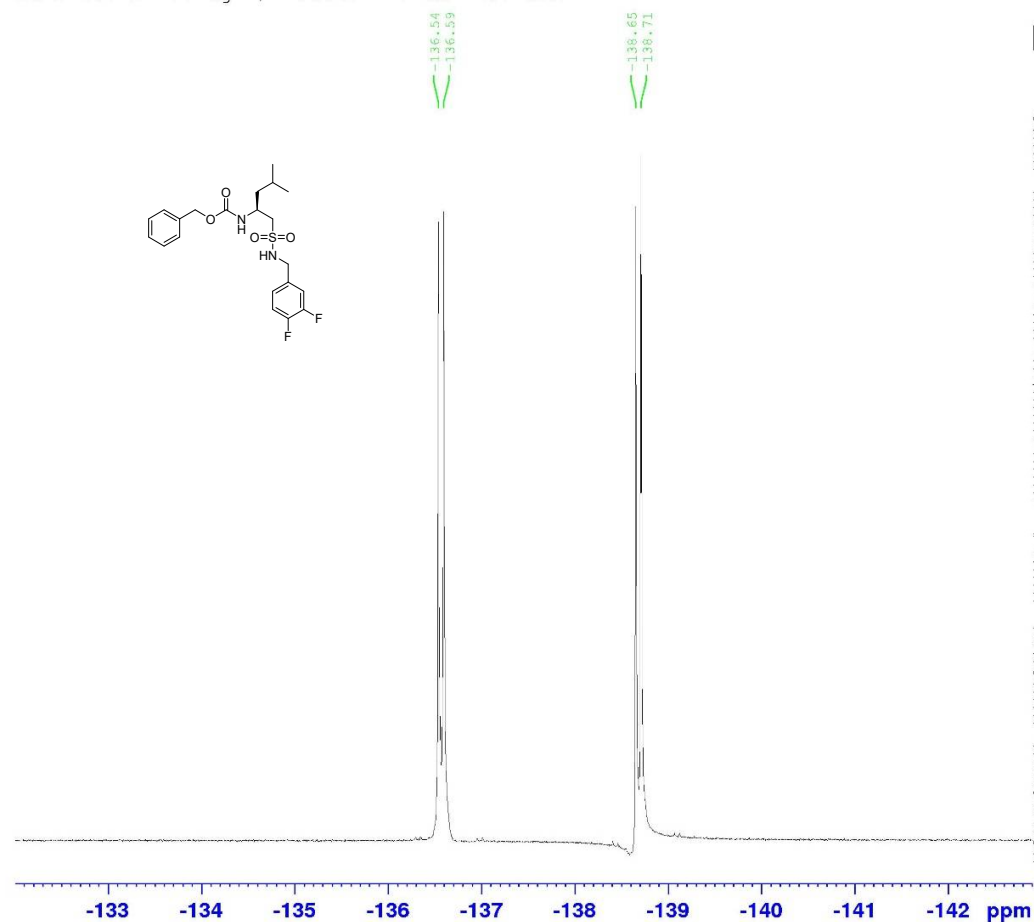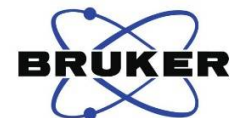

Current Data Parameters  
NAME Diamidy alifaticke 2  
EXPNO 793  
PROCNO 1

F2 - Acquisition Parameters  
Date\_ 20200617  
Time 9.21  
INSTRUM spect  
PROBHD 5 mm PABBO BB-  
PULPROG zgfhigqn  
TD 131072  
SOLVENT  $\text{CDCl}_3$   
NS 16  
DS 4  
SWH 89285.711 Hz  
FIDRES 0.681196 Hz  
AQ 0.7340032 sec  
RG 2050  
DW 5.600 usec  
DE 6.50 usec  
TE 295.6 K  
D1 1.00000000 sec  
D11 0.03000000 sec  
D12 0.00002000 sec  
TD0 1

===== CHANNEL f1 =====  
SFO1 376.4607164 MHz  
NUC1  $^{19}\text{F}$   
P1 13.90 usec  
PLW1 18.75123978 W

===== CHANNEL f2 =====  
SFO2 400.1316005 MHz  
NUC2  $^1\text{H}$   
CPDPRG2 waltz16  
PCPD2 80.00 usec  
PLW2 15.42416954 W  
PLW12 0.29187831 W

F2 - Processing parameters  
SI 65536  
SF 376.4983660 MHz  
WDW EM  
SSB 0  
LB 0.30 Hz  
GB 0  
PC 1.00

# 1.44. Copy of $^1\text{H}$ NMR of **5m**

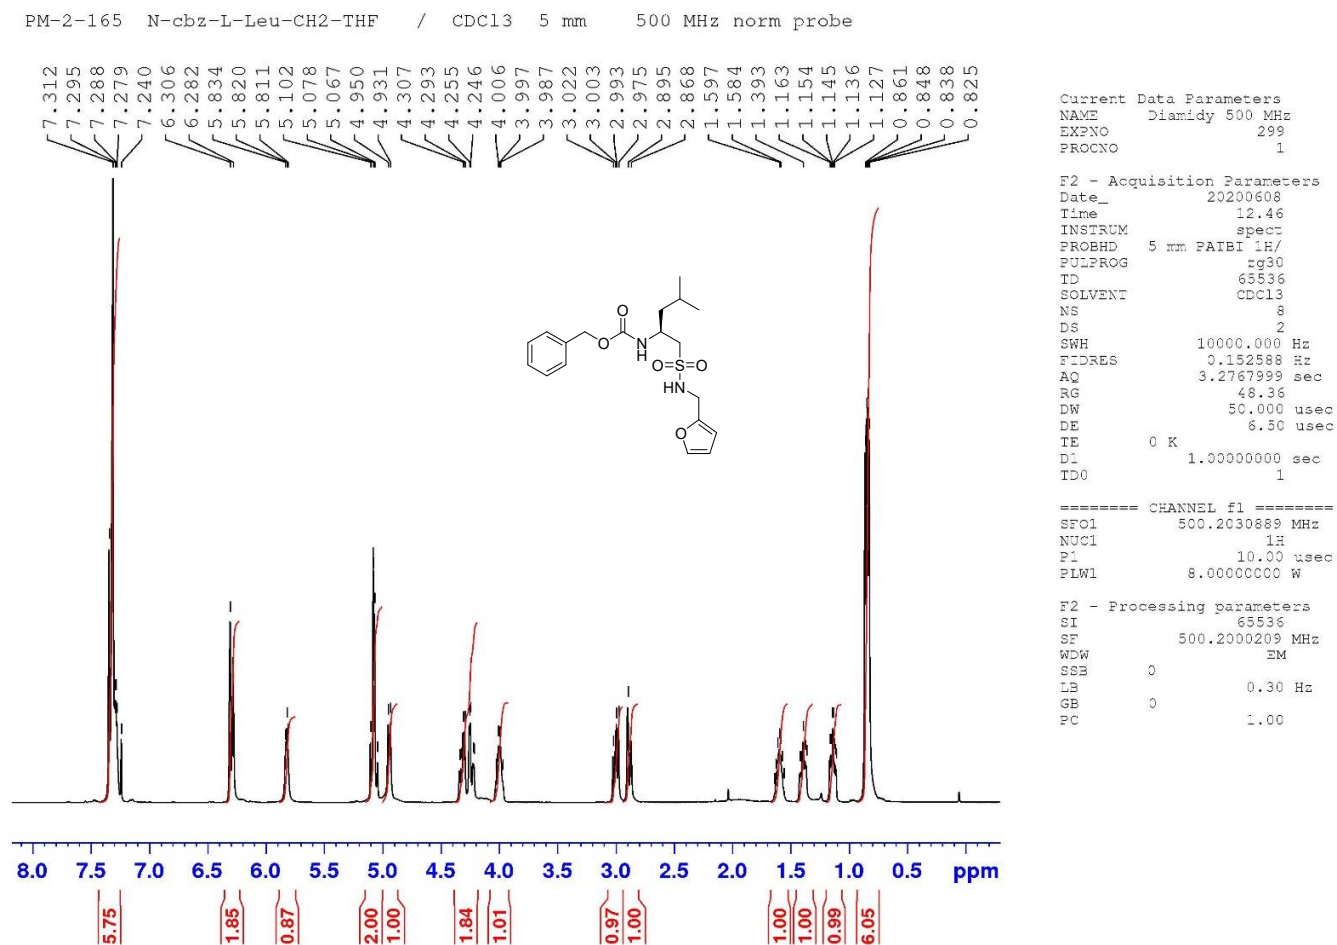

# 1.45. Copy of $^{13}\text{C}$ NMR of **5m**

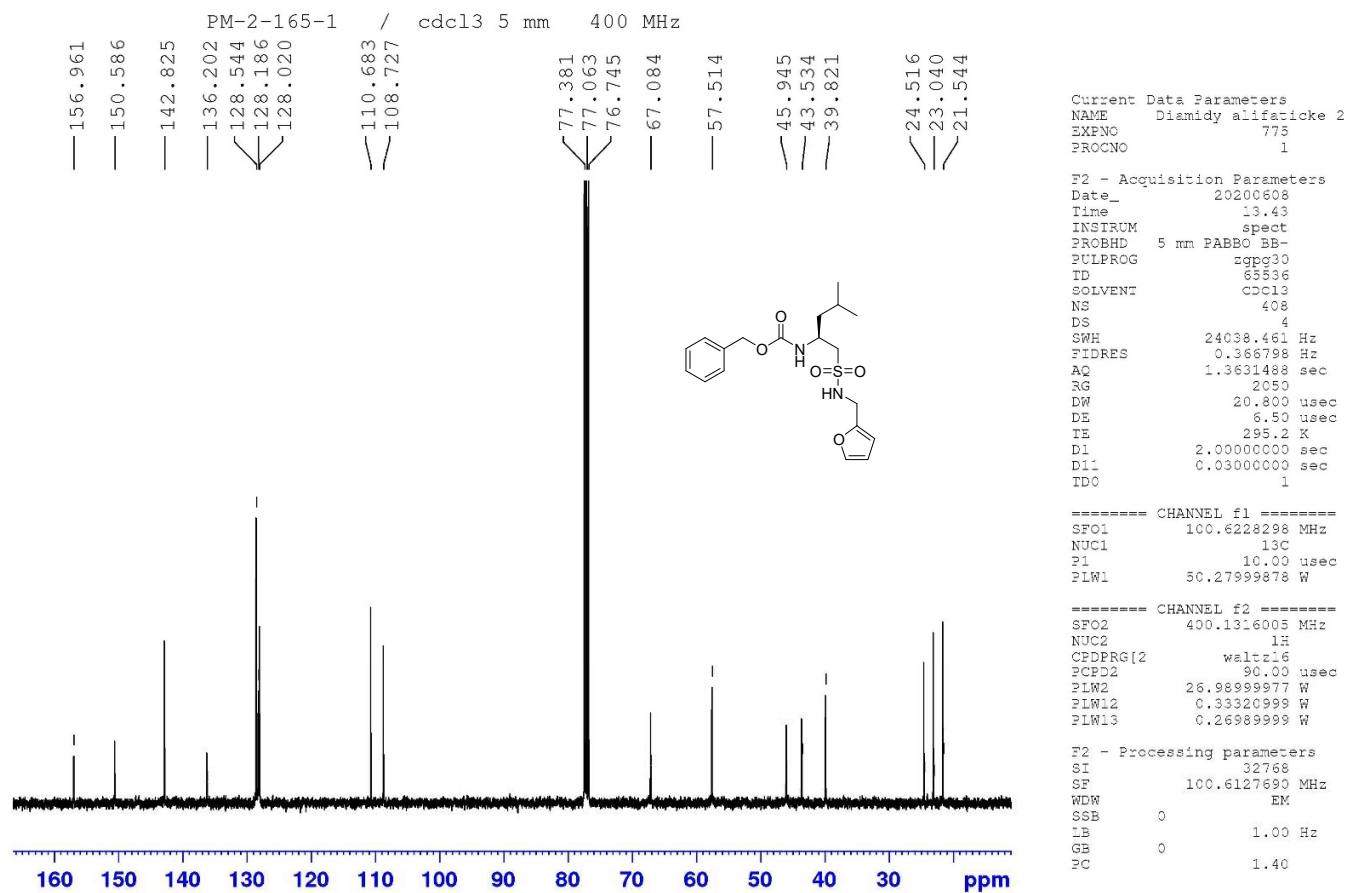

# 1.46. Copy of $^1\text{H}$ NMR of **5n**

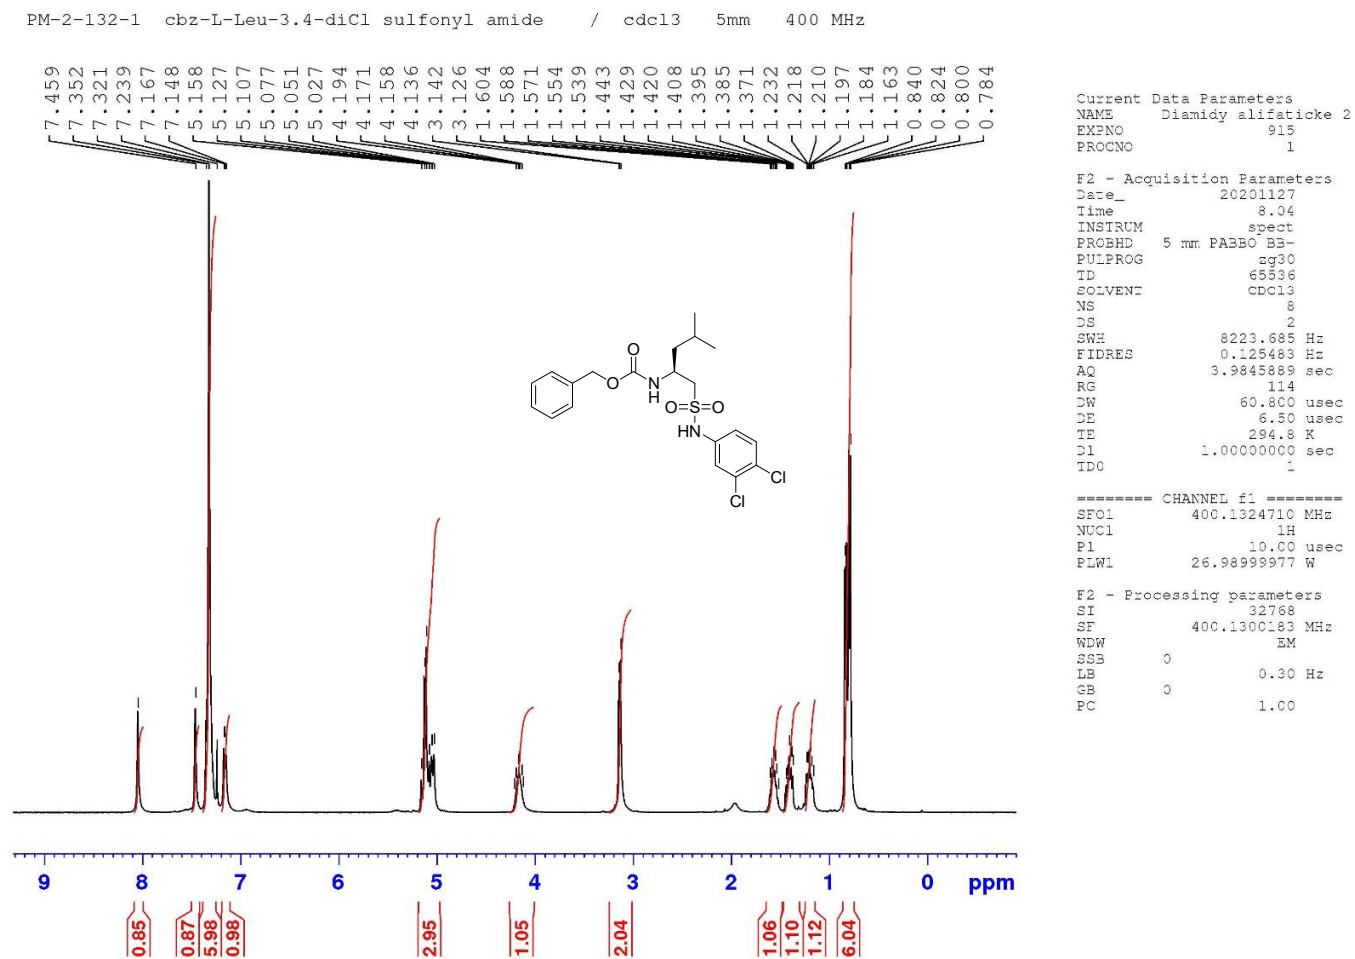

1.47. Copy of  $^{13}\text{C}$  NMR of **5n**

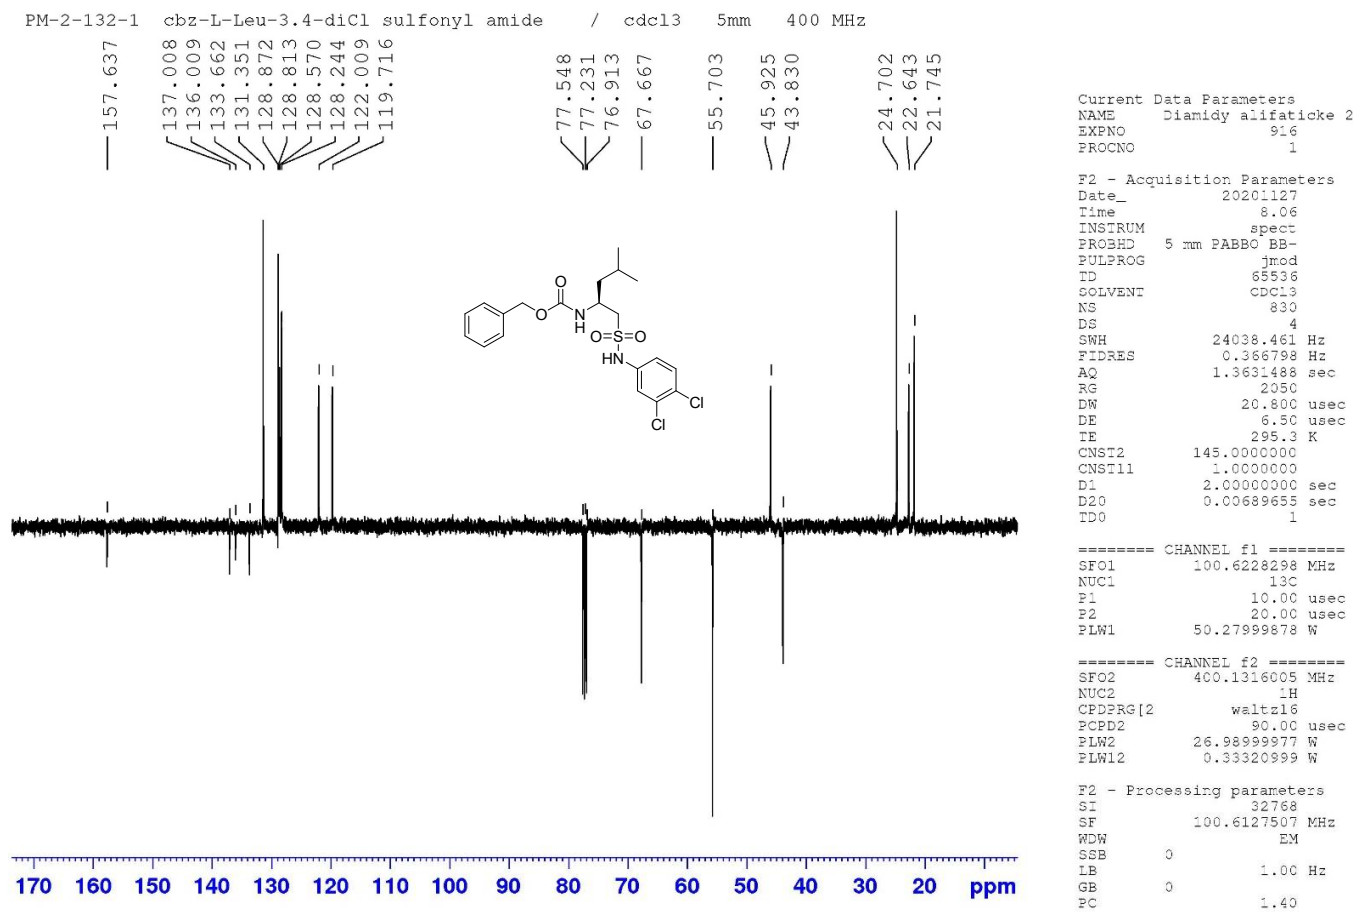

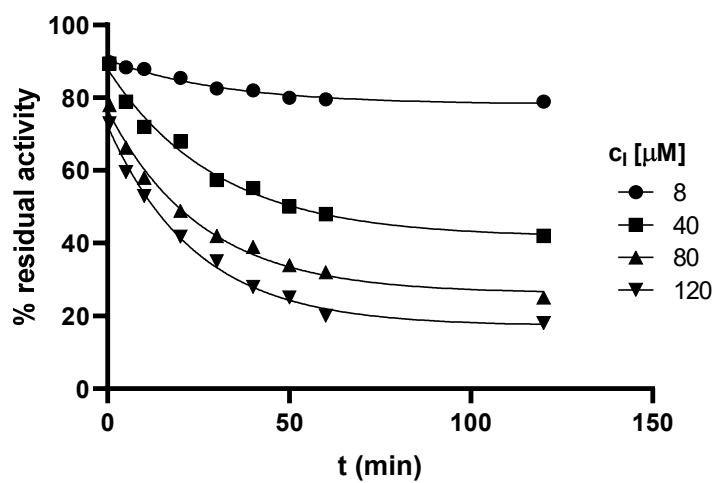

**Figure S2** The dependence % residual BChE activity vs. time in the presence of **5k**. The points are expressed as the mean of at least two separate experiments.

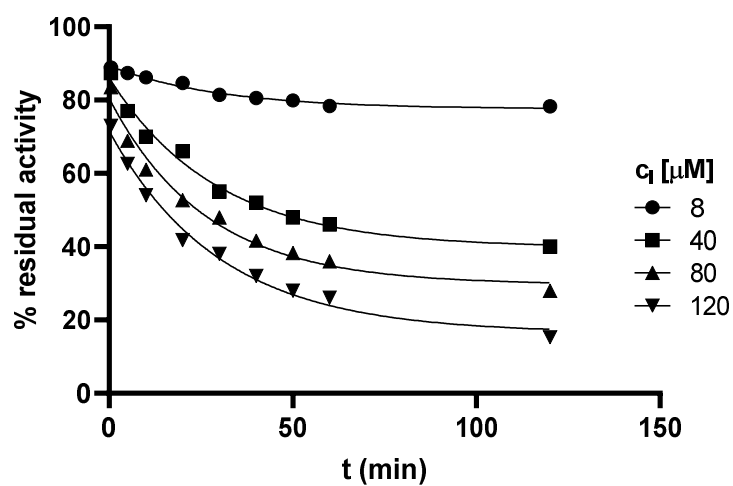

**Figure S3** The dependence % residual BChE activity vs. time in the presence of **5j**. The points are expressed as the mean of at least two separate experiments.

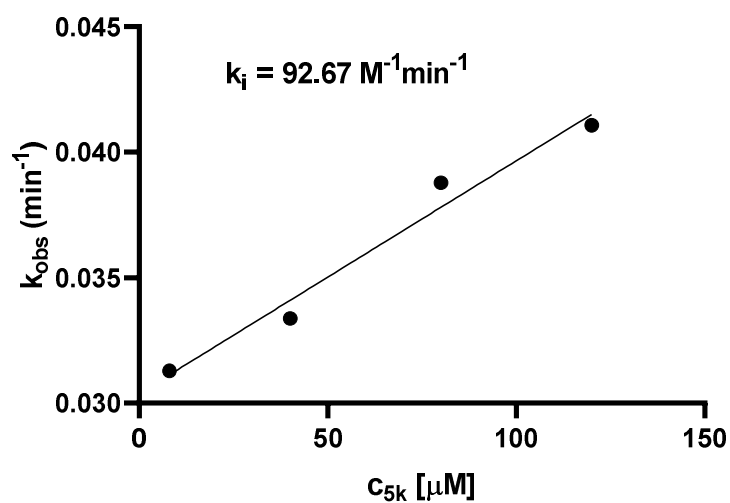

**Figure S4** The dependence pseudo-first-order inhibition rates vs. concentration of **5k**.

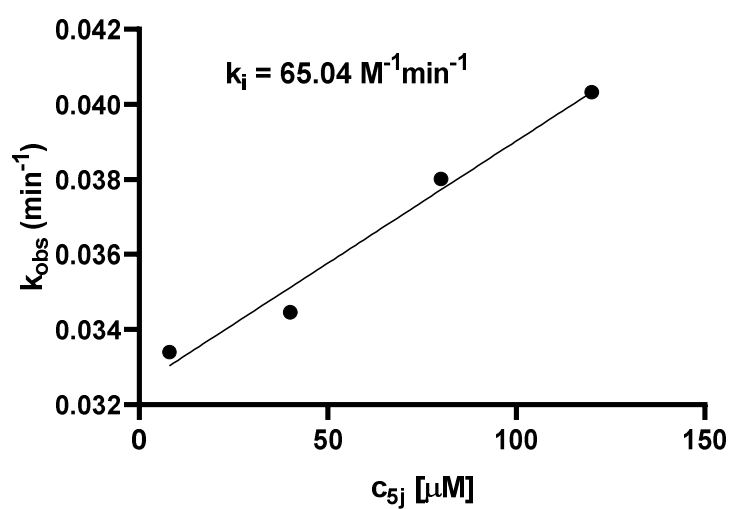

**Figure S5** The dependence pseudo-first-order inhibition rates vs. concentration of **5j**.



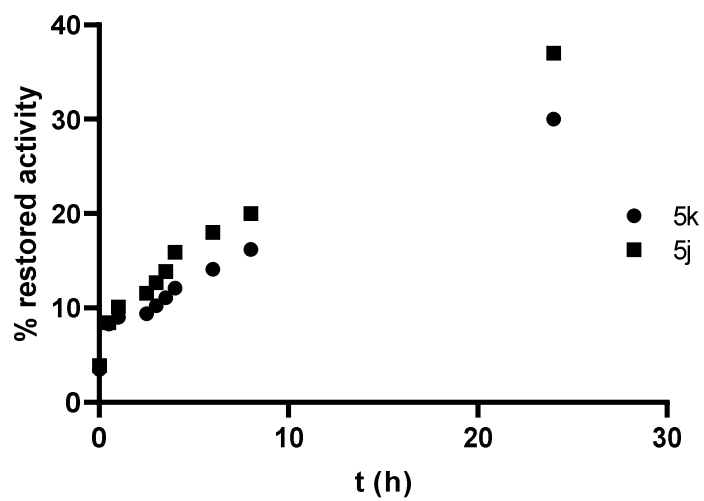

**Figure S6** Reactivation of BChE inhibited by **5k** and **5j**. The points are expressed as the mean of at least two separate experiments.

Preliminary stability test of compound **5k** (HPLC results)

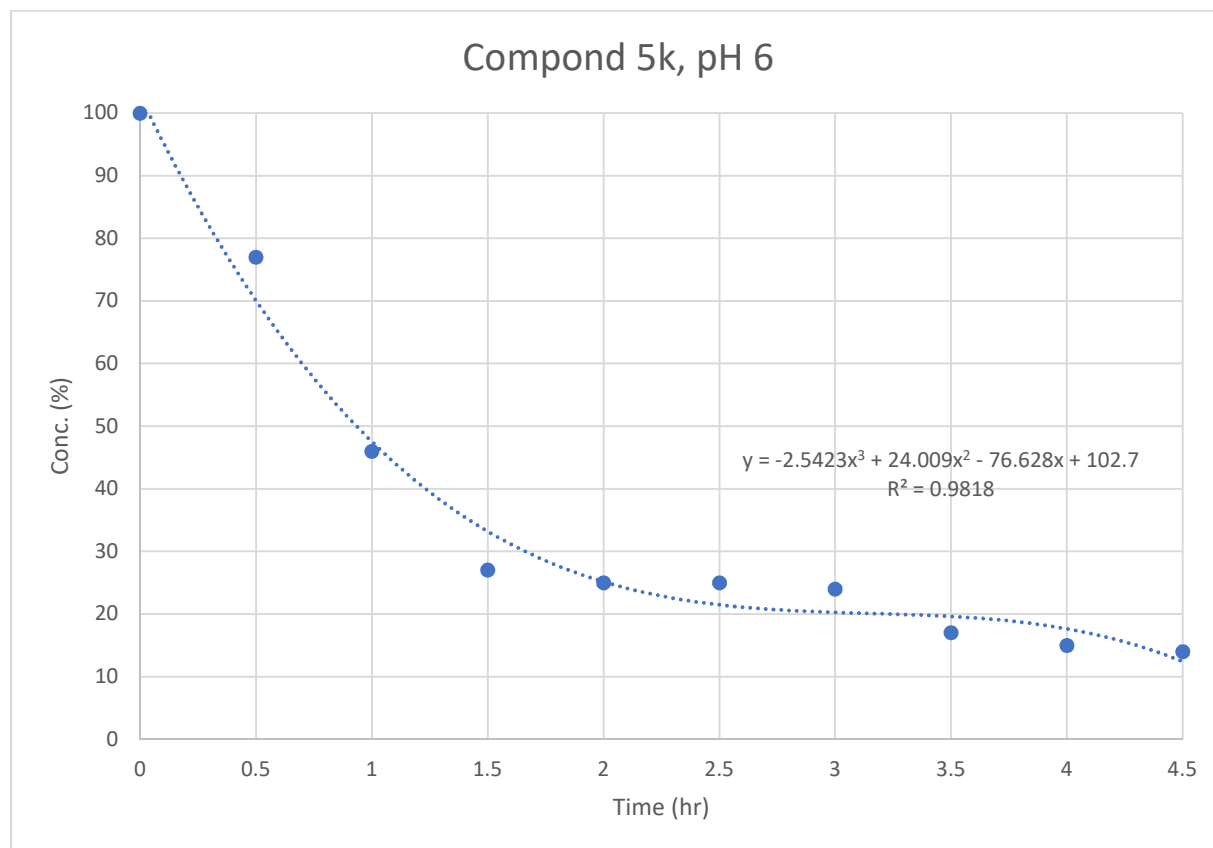

**Fig. 1.** Decomposition study of compound **5k** at pH 6

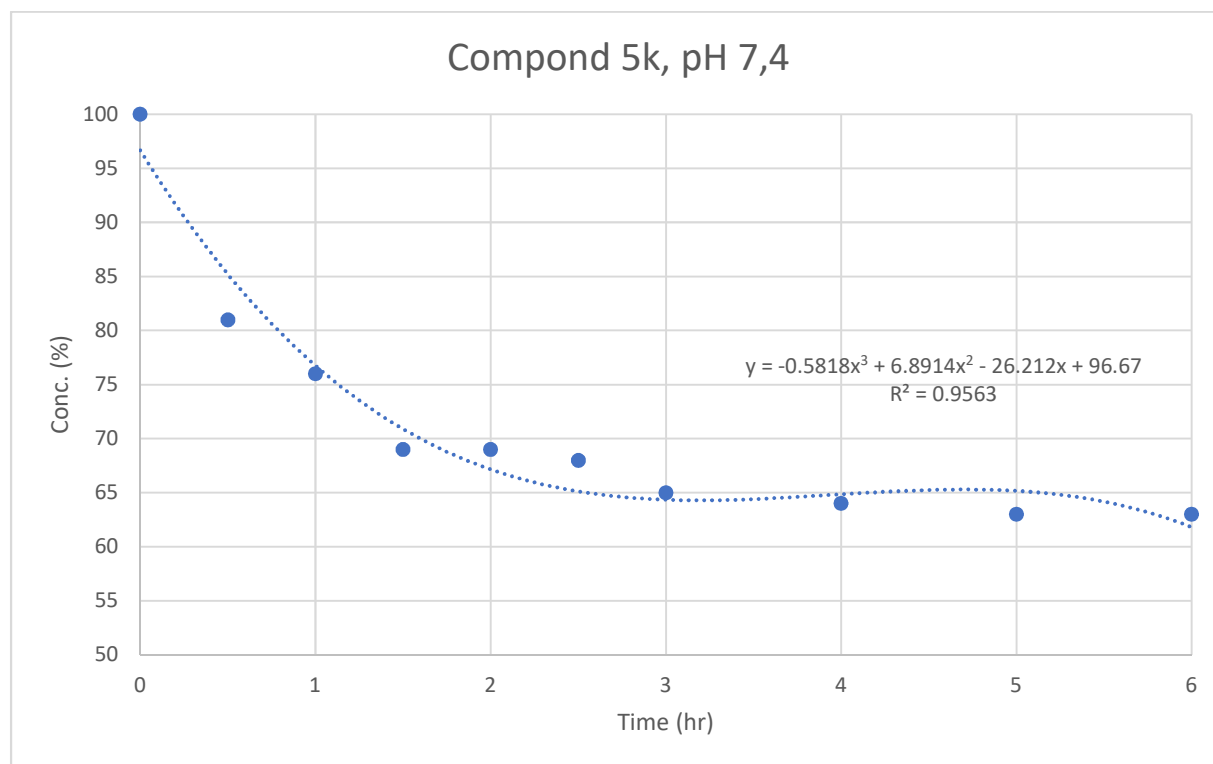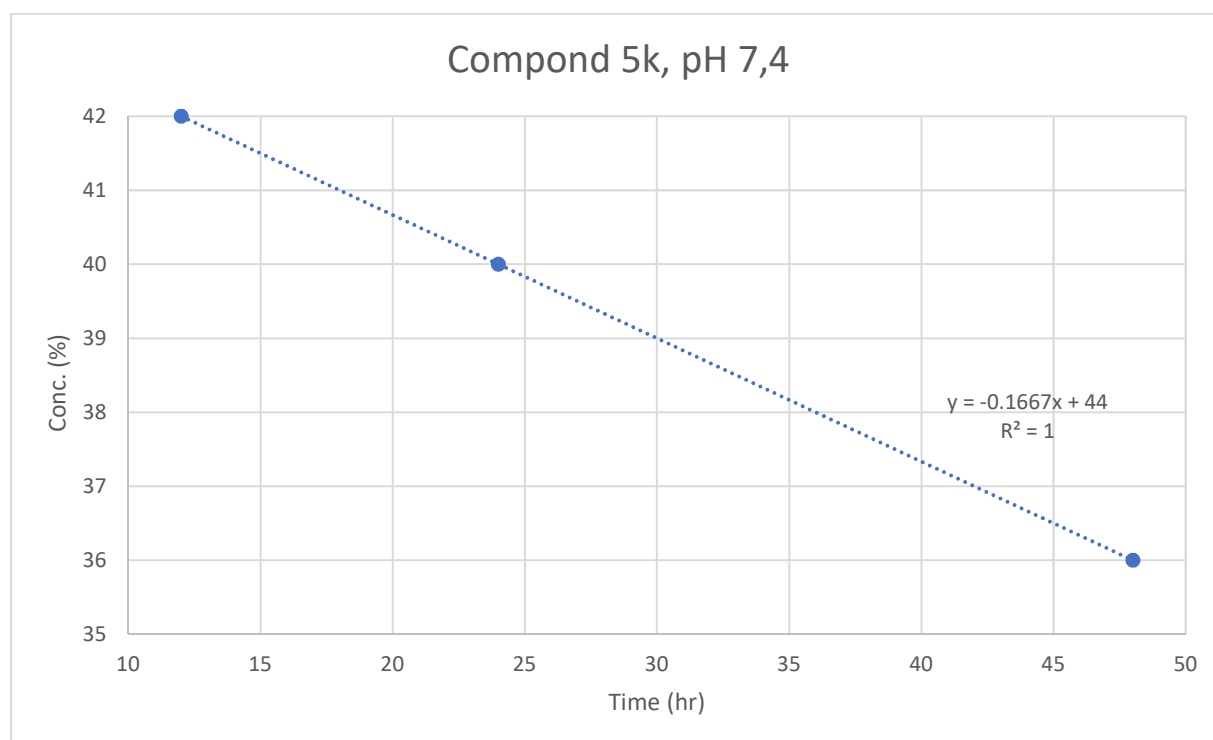

Fig. 2. Decomposition study of compound **5k** at pH 7,4.

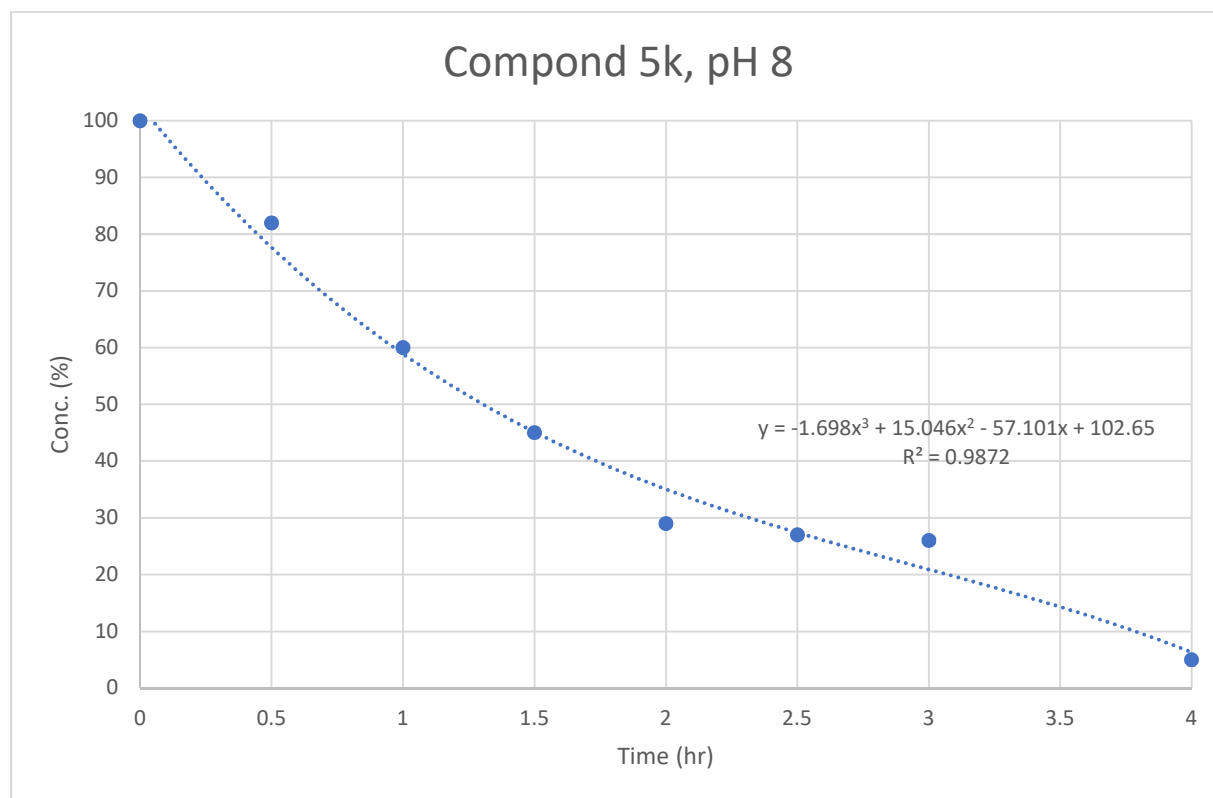

Fig. 3. Decomposition study of compound **5k** at pH 8.

The compound **5k** was chosen for the preliminary study of degradation in three different pH (6, 7.4, 8). Measurement of these degradations was performed by HPLC in reverse phase acetonitrile/water (98:2). The compound was stirred in a tempered buffer (37 °C) of appropriate pH and a sample was taken for HPLC analysis at a specified time. The individual graphs show a clear decomposition of the studied substance as a function of time. In all cases, it is always a pseudo-first order, where one component was in excess and its concentration does not change in time.

**Figure 1** represents decomposition study of compound **5k** at pH 6. The graph shows a significant decomposition in the first hour, when 75% of the substance is rapidly decomposed. However after 6 hrs remains only 13% of starting material in a sample.

In second case (**Figure 1**) If the **5k** substance was stirred in a pH 7.4 buffer, its decomposition took twice as long as in the case of pH 6 as it can be seen from the graph. Then there is a gradual decomposition, when only 36% of the starting material remains in 48 hours.

A more interesting situation occurs when the compound **5k** is stirred in a buffer of pH 8. Very rapid decomposition occurs as early as 4 hours, when only 5% of the starting material is present in the mixture.

As already mentioned, this is a preliminary study, which was repeated only twice. This is statistically low and it will require further follow-up experiments.

**Procedure:**

The substance (5k) was dissolved in a buffer of desired pH in Erlenmayer flask and it was placed to tempered water bath (37 °C). At zero time, a sample is taken immediately from solution (1 ml) and analyzed by HPLC (column C18 for reverse phase, mobil phase AcCN/Water 98/2, column temp. 40 °C, flow rate 1 ml/min, injection 10 µl, detection at 214 and 254 nm). Another samples which were taken from solution were at times: 0,5h, 1h, 1,5h, 2h, 2,5h, 3h, 4h, 5h, 6h, 12h, 24h, 48h, 72h and 96h.
